# Supplementary material for: Controlling polymer architecture to design dynamic network materials with multiple dynamic linkers
Source: Royal Society of Chemistry journal article supplement (doi:10.1039/d0me00015a), 2020-01-01
Supplement: d0me00015a1.pdf [file d0me00015a1.pdf]

# **Supplementary Information: Controlling Polymer Architecture to Design Dynamic Network Materials with Multiple Dynamic Linkers**

Jafer R. Vakil,<sup>a</sup> Nethmi De Alwis Watuthantrige,<sup>a</sup> Zachary A. Digby,<sup>a</sup> Borui Zhang,<sup>a</sup> Hannah A. Lacy,<sup>a</sup> Jessica L. Sparks,<sup>b</sup> Dominik Konkolewicz<sup>a,\*</sup>

<sup>a</sup> Department of Chemistry and Biochemistry, Miami University, 651 E High St. Oxford, OH, 45056, USA

<sup>b</sup> Department of Chemical Paper and Biomedical Engineering, Miami University, 650 E High St. Oxford, OH, 45056, USA

\* corresponding author: [d.konkolewicz@miamiOH.edu](mailto:d.konkolewicz@miamiOH.edu)

### Determination of number average molecular weight ( $M_n$ ) and composition by NMR

For typical PEA-UPyMA-FMA RAFT materials, peak at 3.36 ppm (PADTC-CH<sub>2</sub> at trithiocarbonate) was calibrated to 2H. Peaks centered at 5.0 ppm (FMA-furfuryl) was integrated and divided by 2 (2H from FMA) delivering the FMA units. The peaks near 3.20 ppm (UPyMA) were integrated and divided by 4 (2H from UPyMA urethane protons  $\underline{\text{CH}_2}\text{NHCOOCH}_2$  and 2H from UPyMA urea protons  $\underline{\text{CH}_2}\text{NHCONH}$ ) delivering the UPyMA units. The peak at 4.10 ppm was integrated, and the resulting integral at 4.1 ppm had the integral values of the peaks near 3.2 ppm subtracted (4H from UPyMA from CH<sub>2</sub> at UPyMA ester and CH<sub>2</sub> at UPyMA  $\text{NHCOO}\underline{\text{CH}_2}$  urethane), and the remaining signal, divided by 2 (2H from EA CH<sub>2</sub> ester protons) delivering the EA units.

For the PEA-UPyMA-FMA FRP material, peak at 2.7 ppm (thioether R-S- $\underline{\text{CH}_2}$  from first added monomer) was calibrated to 2H. Peaks centered at 5.0 ppm (FMA-furfuryl) was integrated and divided by 2 (2H from FMA) delivering the FMA units. The peaks near 3.20 ppm (UPyMA) were integrated and divided by 4 (2H from UPyMA urethane protons  $\underline{\text{CH}_2}\text{NHCOOCH}_2$  and 2H from UPyMA urea protons  $\underline{\text{CH}_2}\text{NHCONH}$ ) delivering the UPyMA units. The peak at 4.10 ppm was integrated, and the resulting integral at 4.1 ppm had the integral values of the peaks near 3.2 ppm subtracted (4H from UPyMA from CH<sub>2</sub> at UPyMA ester and CH<sub>2</sub> at UPyMA  $\text{NHCOO}\underline{\text{CH}_2}$  urethane), and the remaining signal, divided by 2 (2H from EA CH<sub>2</sub> ester protons) delivering the EA units.

$M_n$  by NMR is typically calculated via multiplying monomer units by their respective molecular weights, a sum of the resulting values and the molecular weight of the chain transfer agent (PADTC or DDT) gives the experimental  $M_n$  value.

**Supplemental Data:**

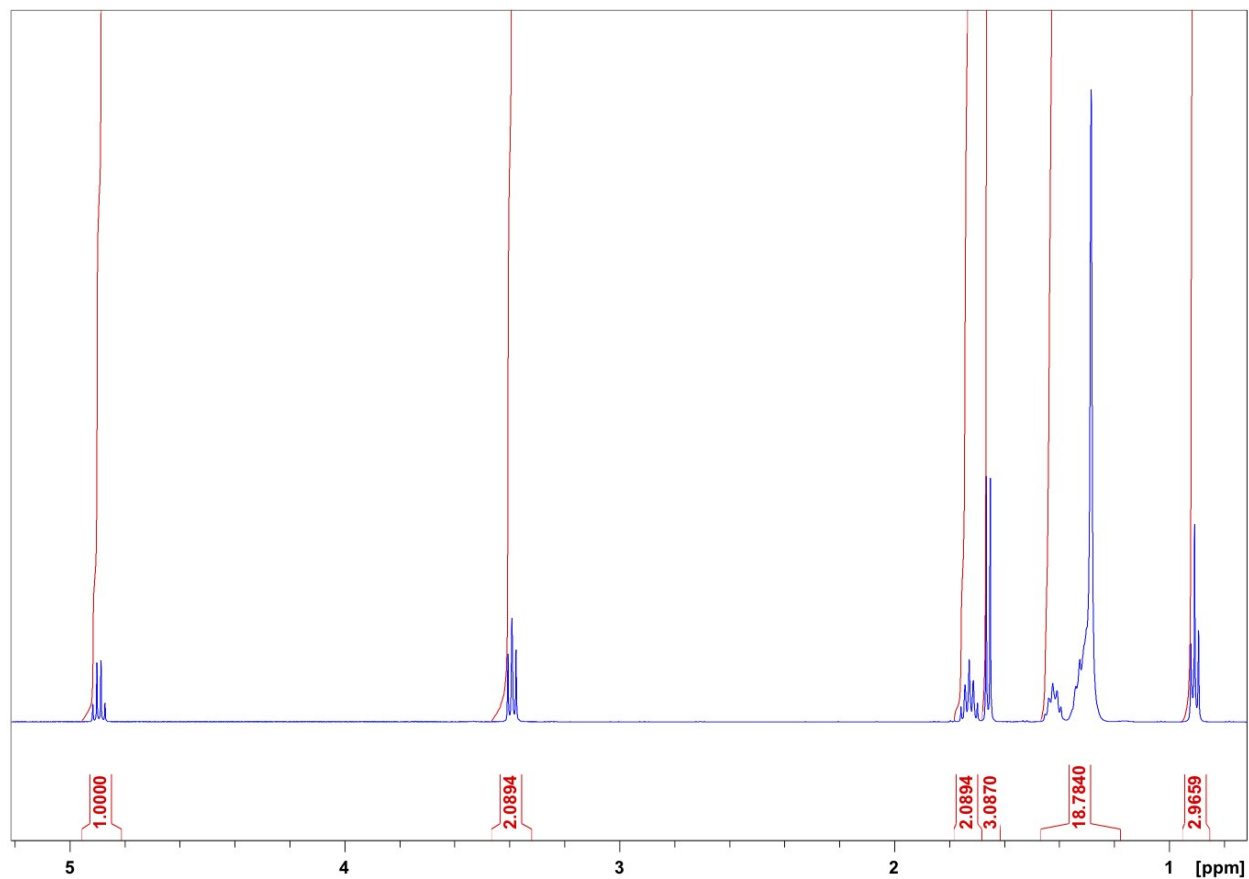

**Figure S1:** NMR spectrum of PADTC.

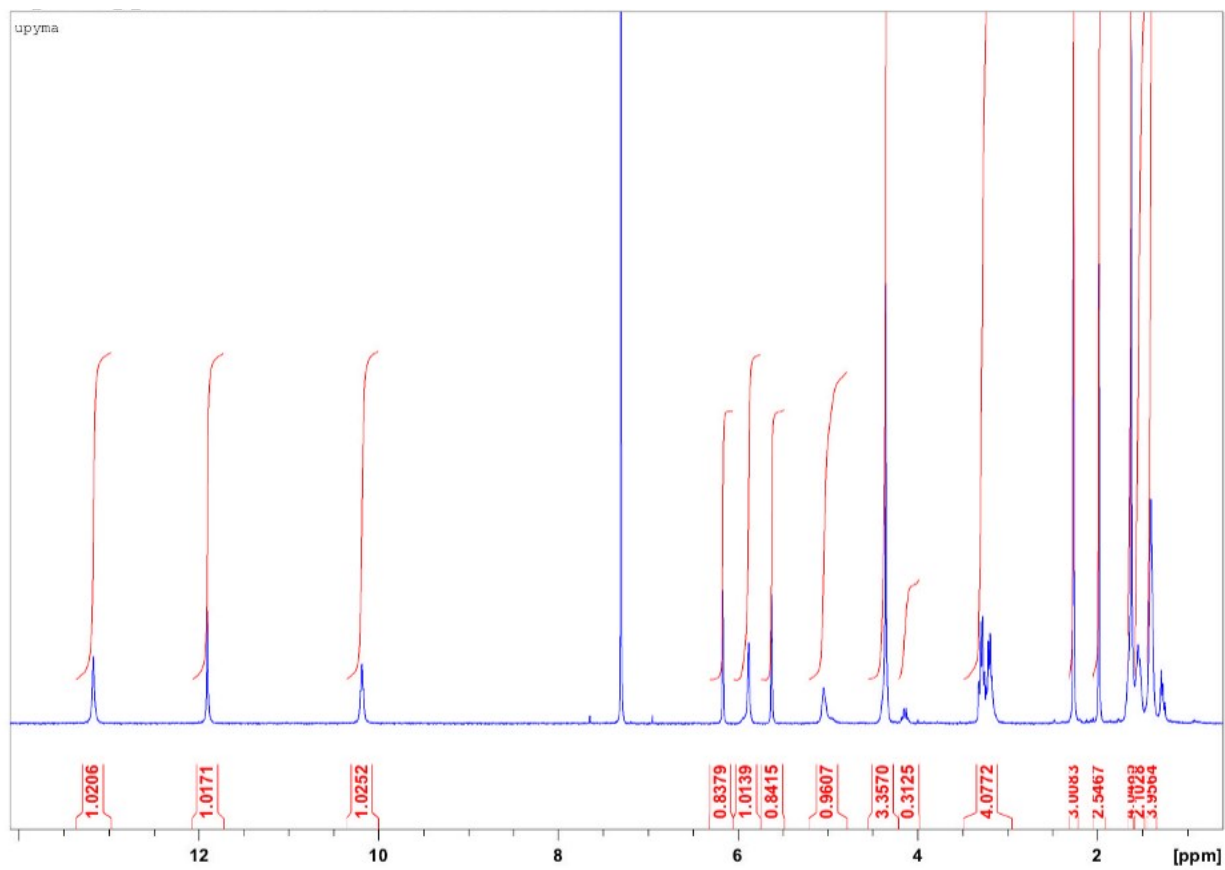

**Figure S2:** NMR spectrum of UPyMA.

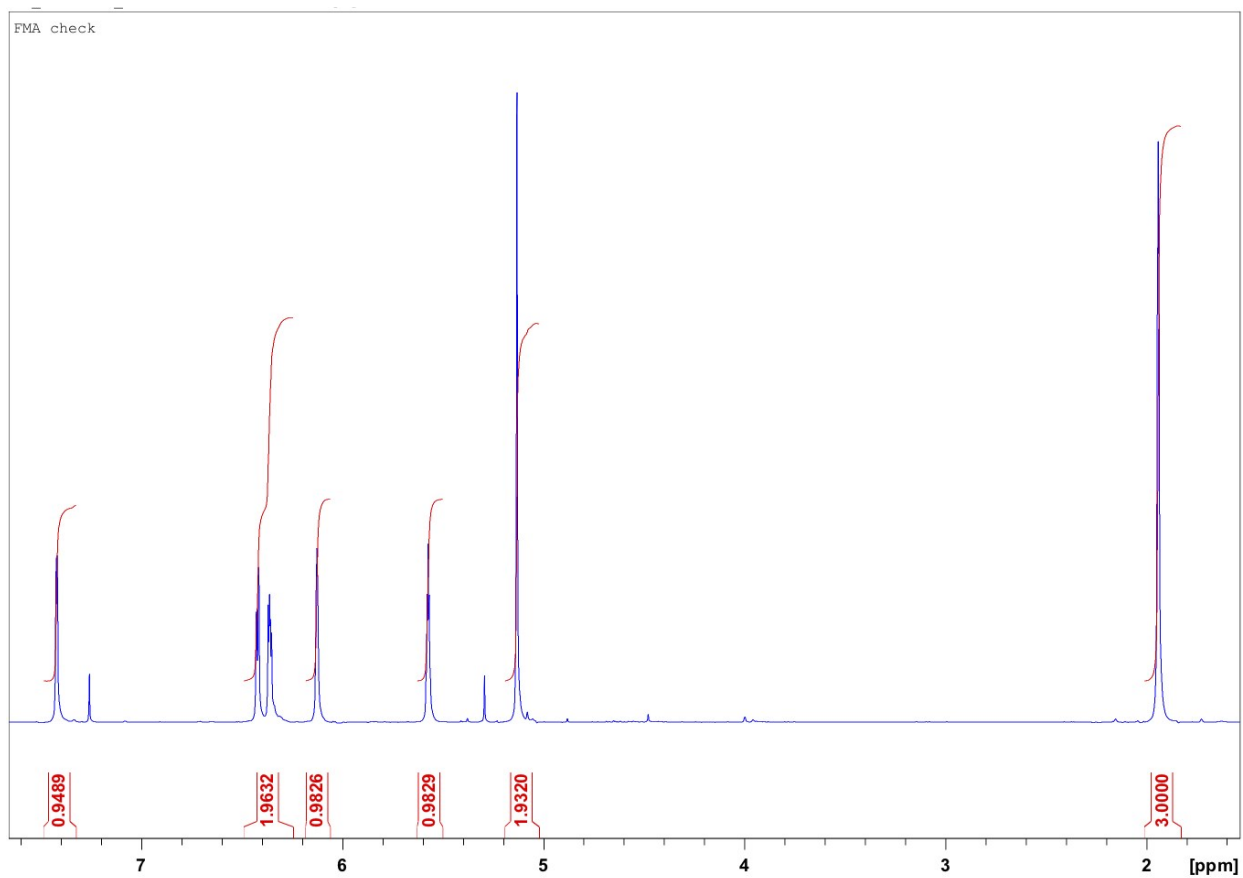

**Figure S3:** NMR Spectrum of FMA.

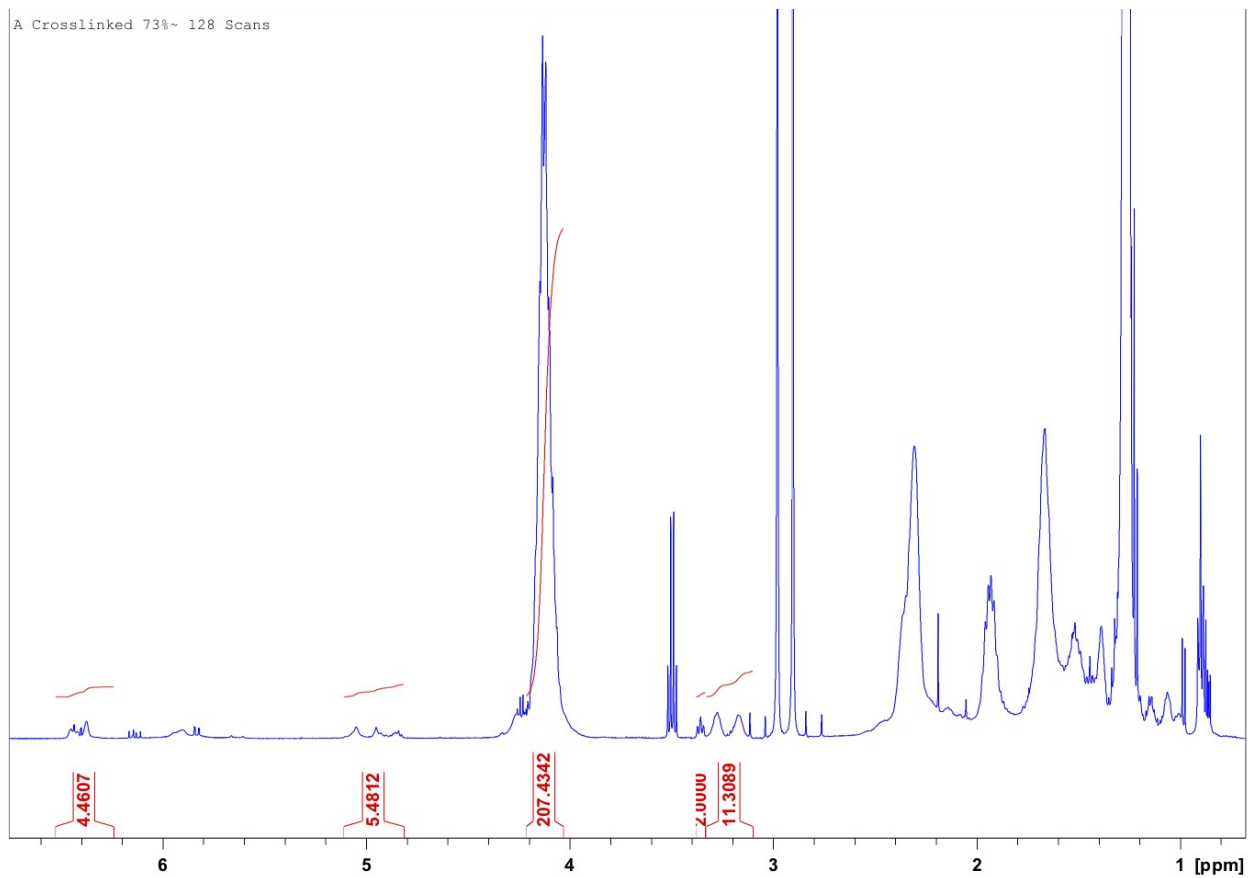

**Figure S4:** NMR Spectrum of PEA<sub>100</sub>-UPyMA<sub>2.5</sub>-FMA<sub>2.5</sub> made by RAFT

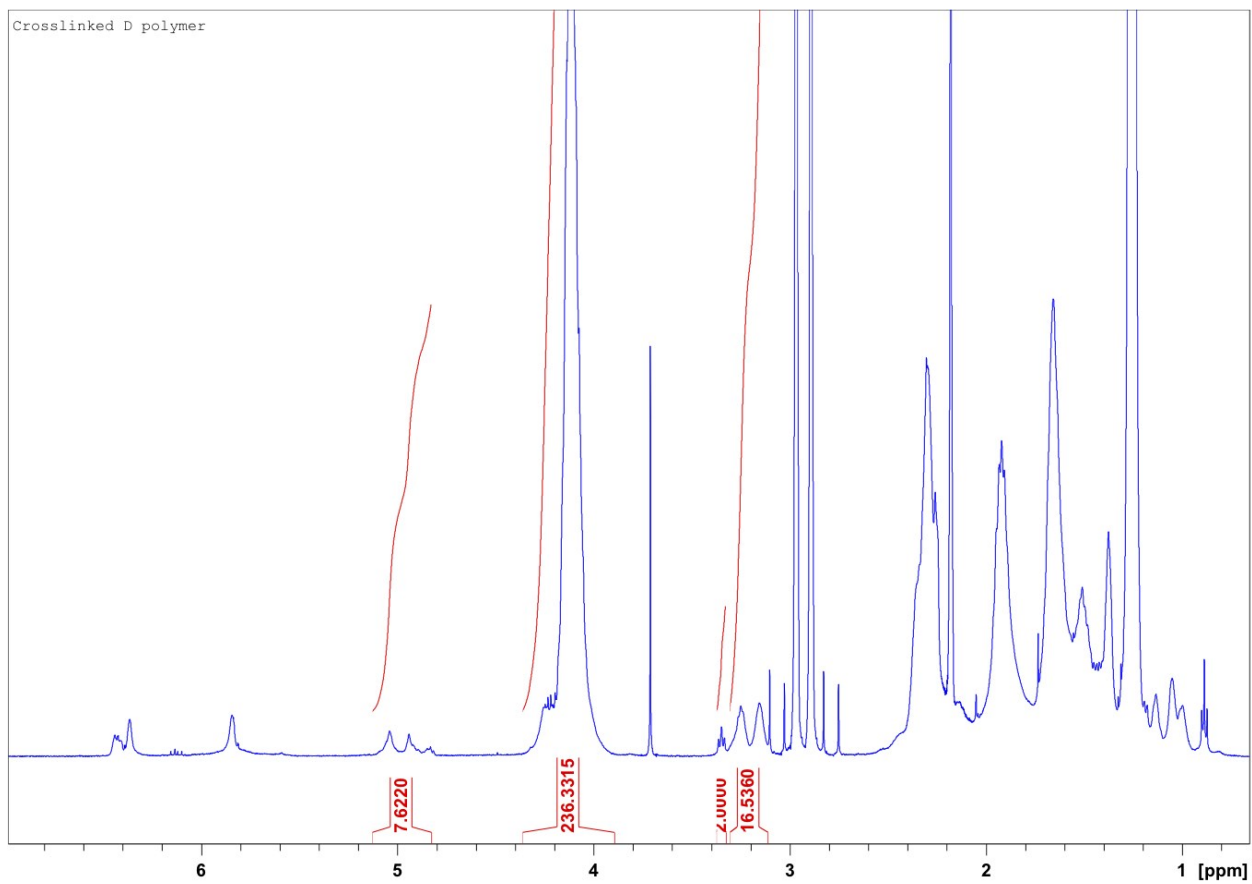

**Figure S5:** NMR Spectrum of PEA<sub>100</sub>-UPyMA<sub>3.75</sub>-FMA<sub>3.75</sub> made by RAFT

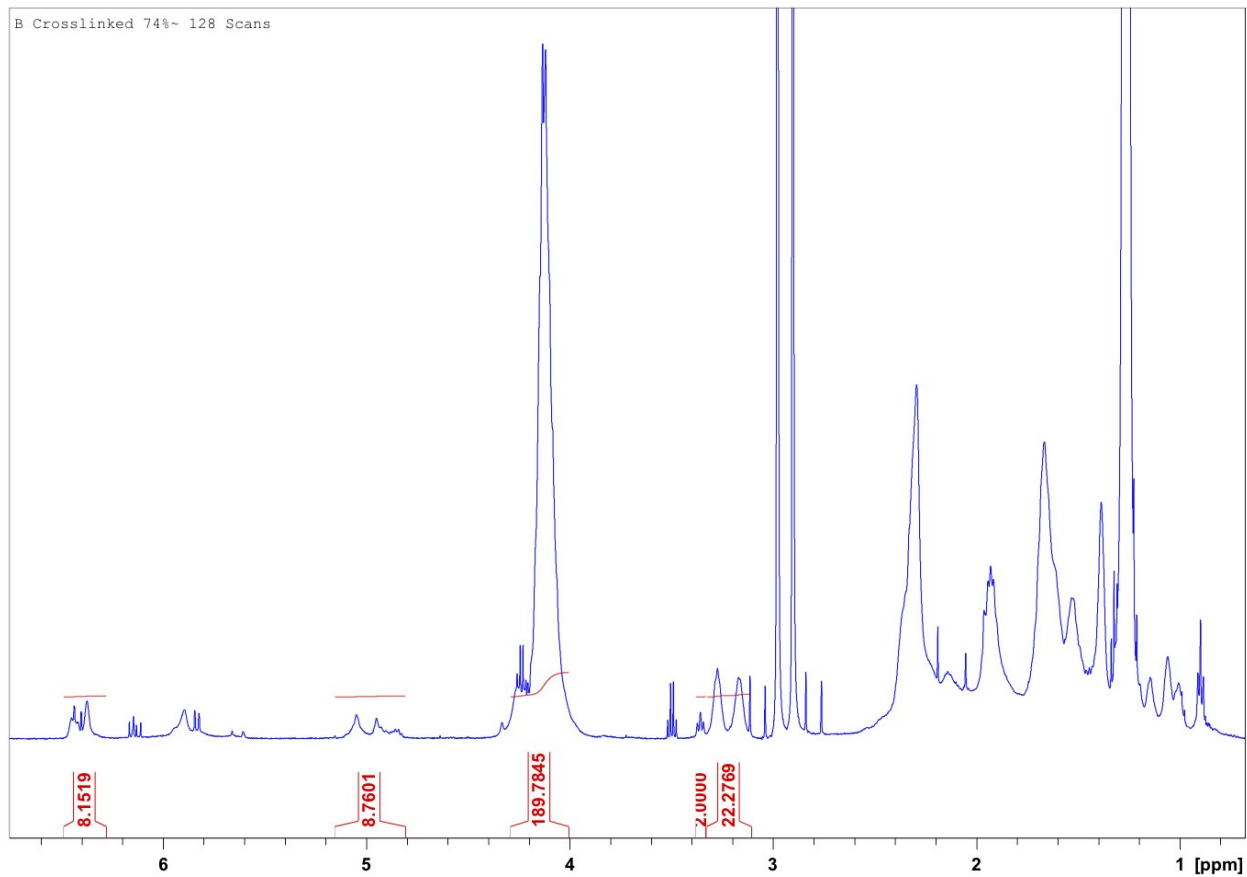

**Figure S6:** NMR Spectrum of PEA<sub>100</sub>-UPyMA<sub>5</sub>-FMA<sub>5</sub> made by RAFT



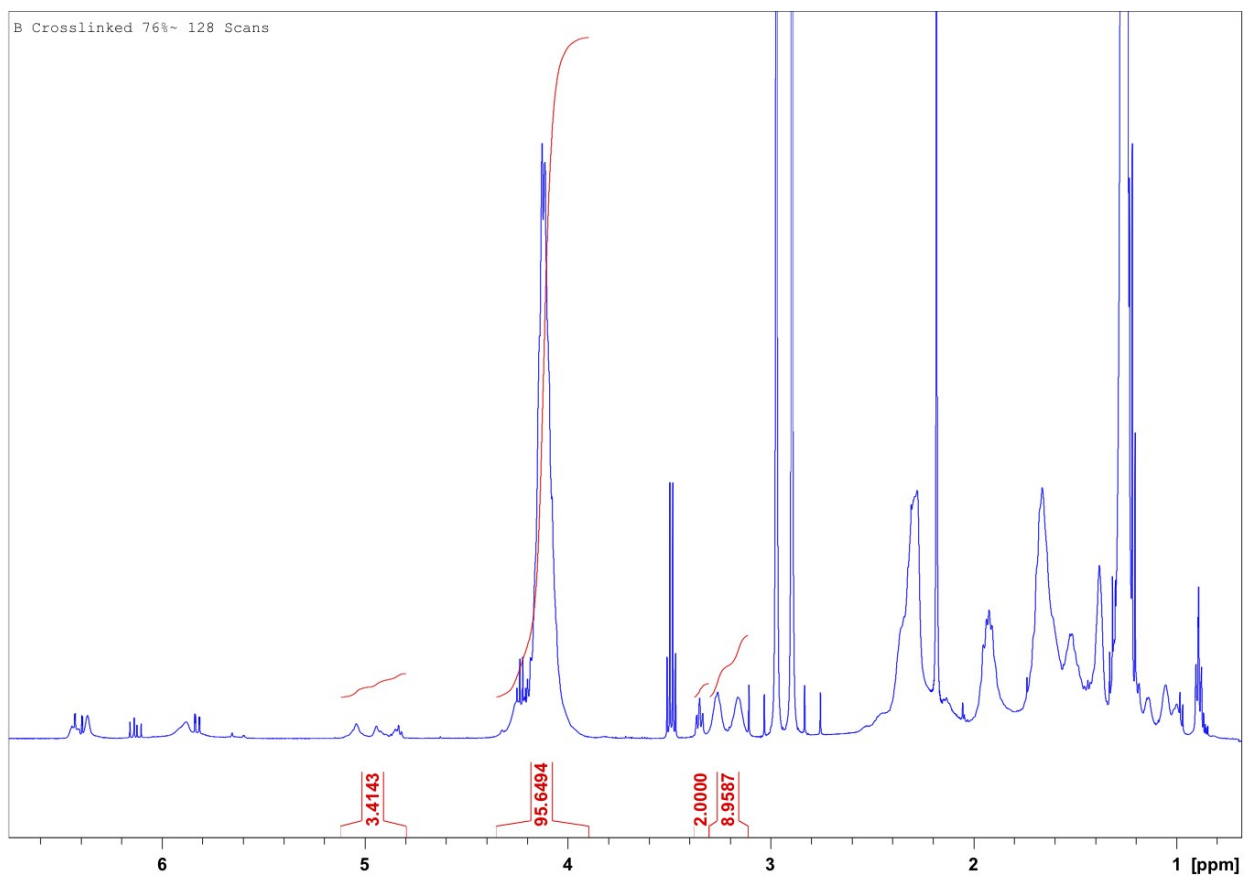

**Figure S7:** NMR Spectrum of PEA<sub>50</sub>-UPyMA<sub>1.9</sub>-FMA<sub>1.9</sub> made by RAFT

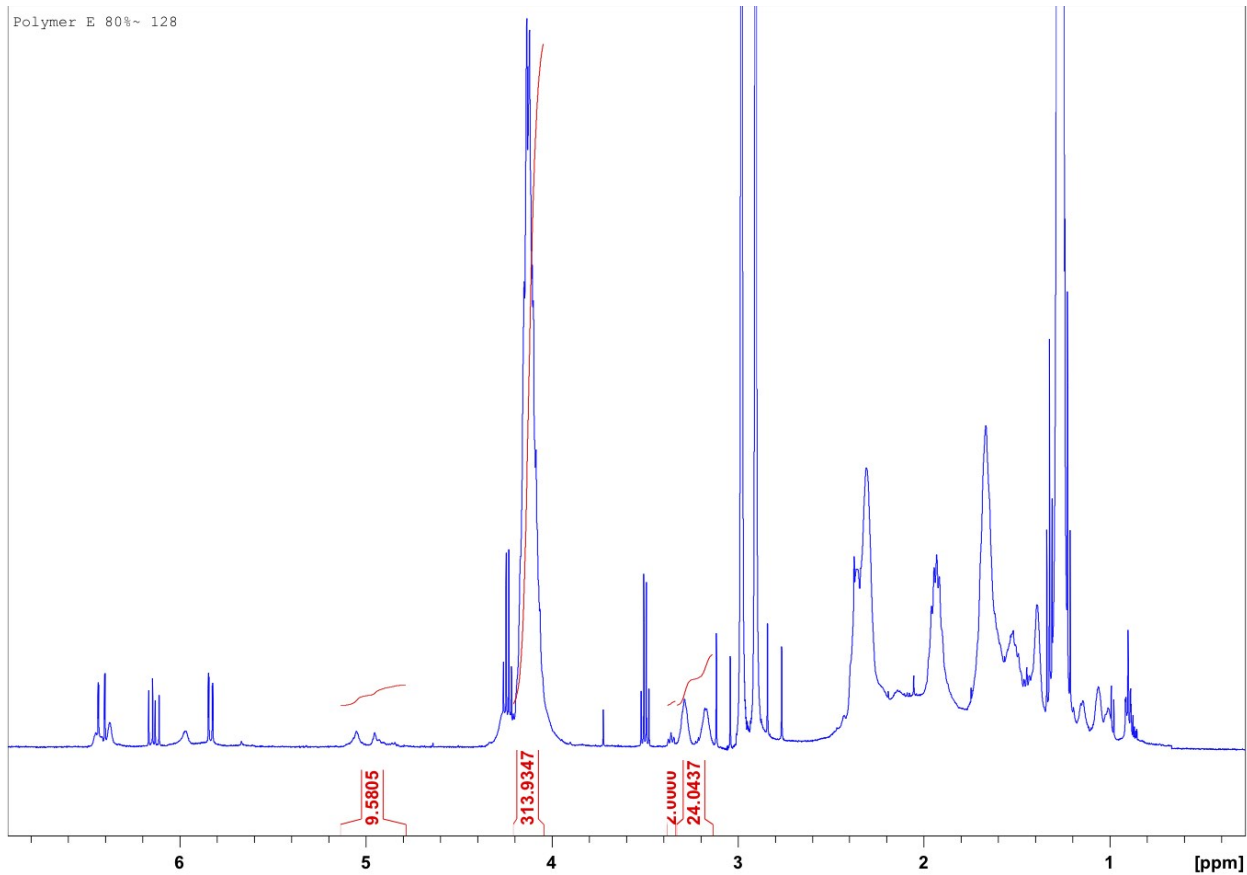

**Figure S8:** NMR Spectrum of PEA<sub>150</sub>-UPyMA<sub>5,6</sub>-FMA<sub>5,6</sub> made by RAFT

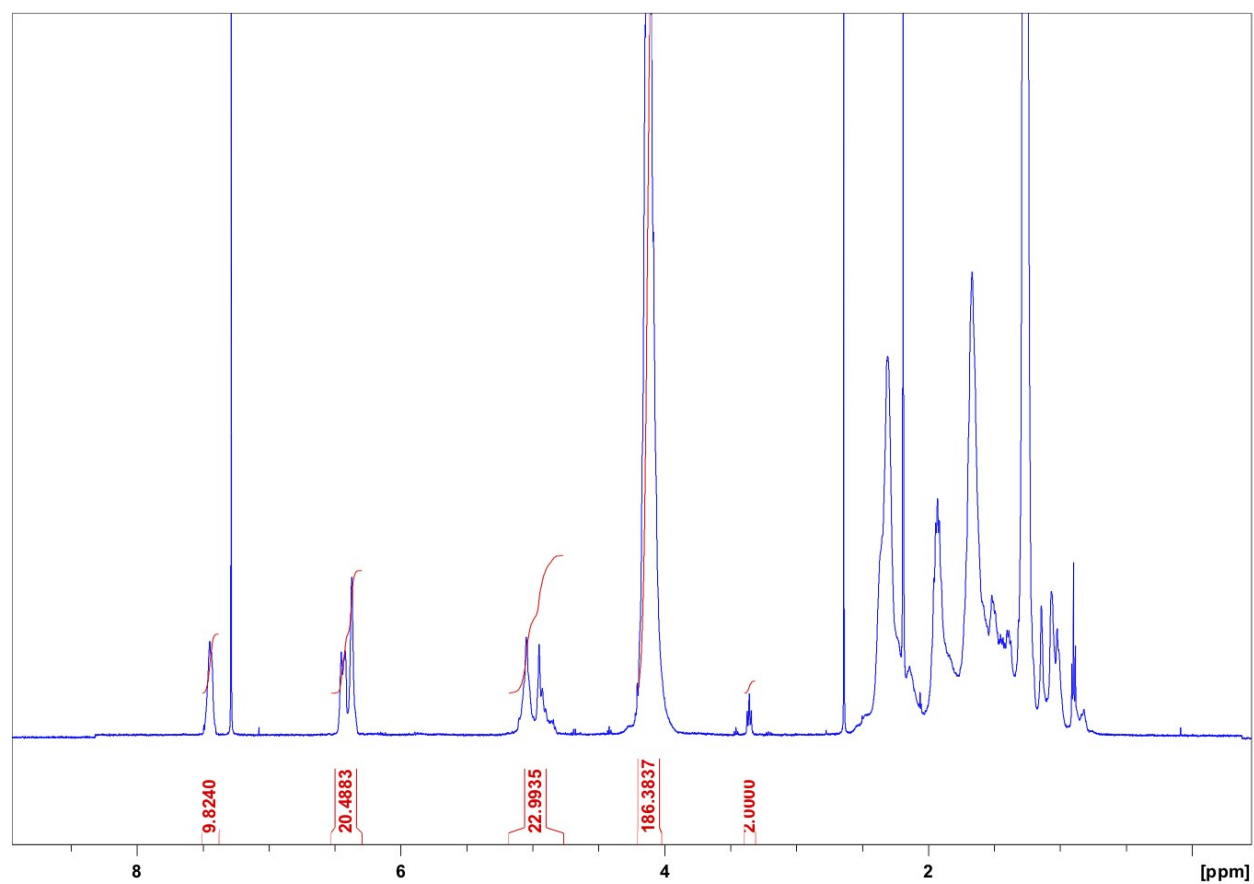

**Figure S9:** NMR Spectrum of PEA<sub>100</sub>-UPyMA<sub>0</sub>-FMA<sub>10</sub> made by RAFT

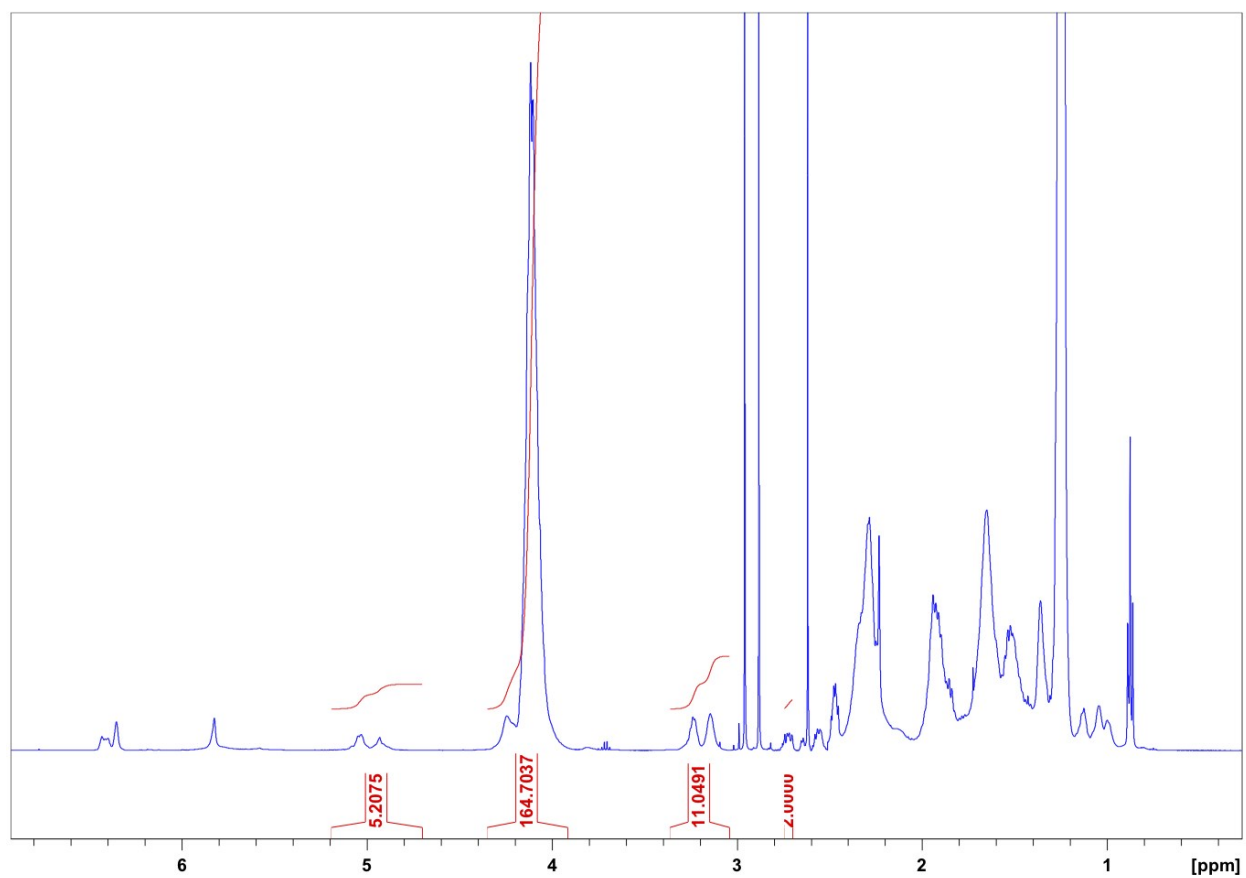

**Figure S10:** NMR Spectrum of PEA<sub>100</sub>-UPyMA<sub>3.75</sub>-FMA<sub>3.75</sub> made by FRP

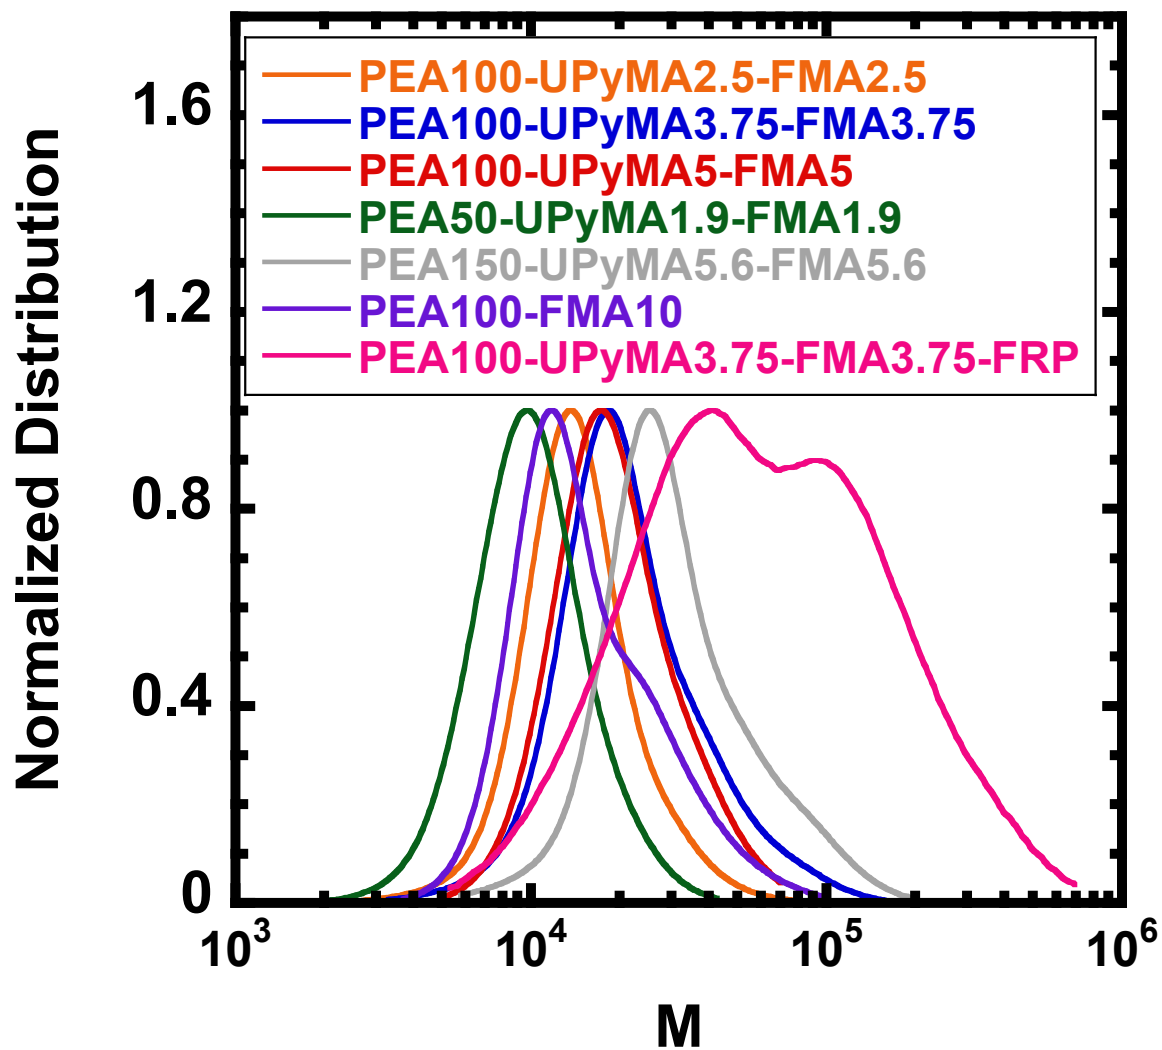

Figure S11: SEC traces of all polymers synthesized.

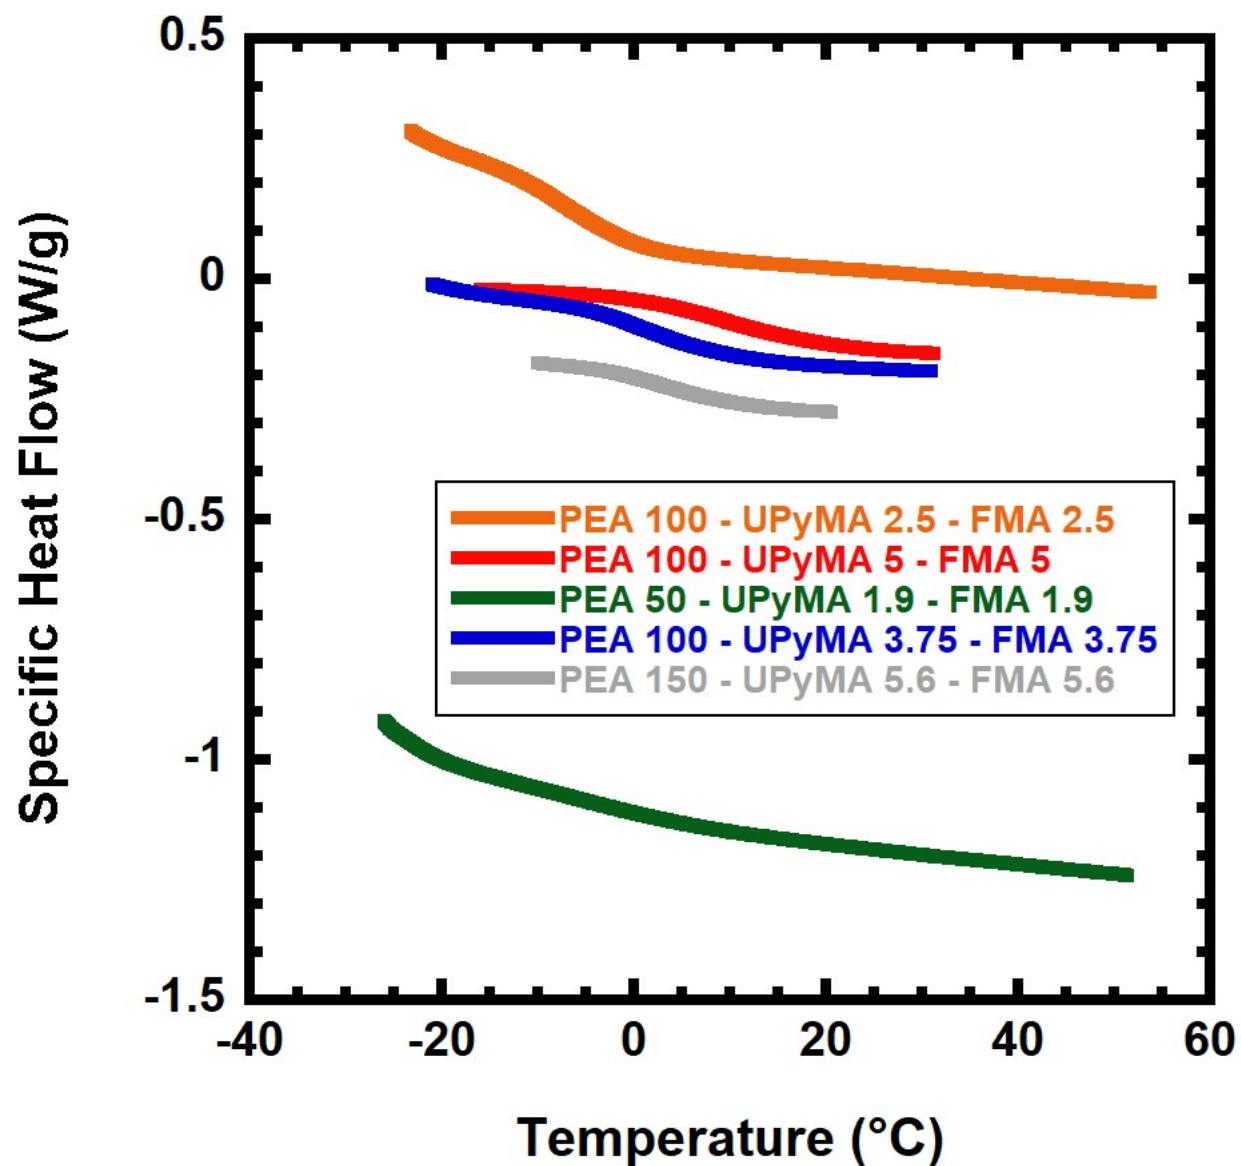

Figure S12: Typical DSC traces of each material studied.

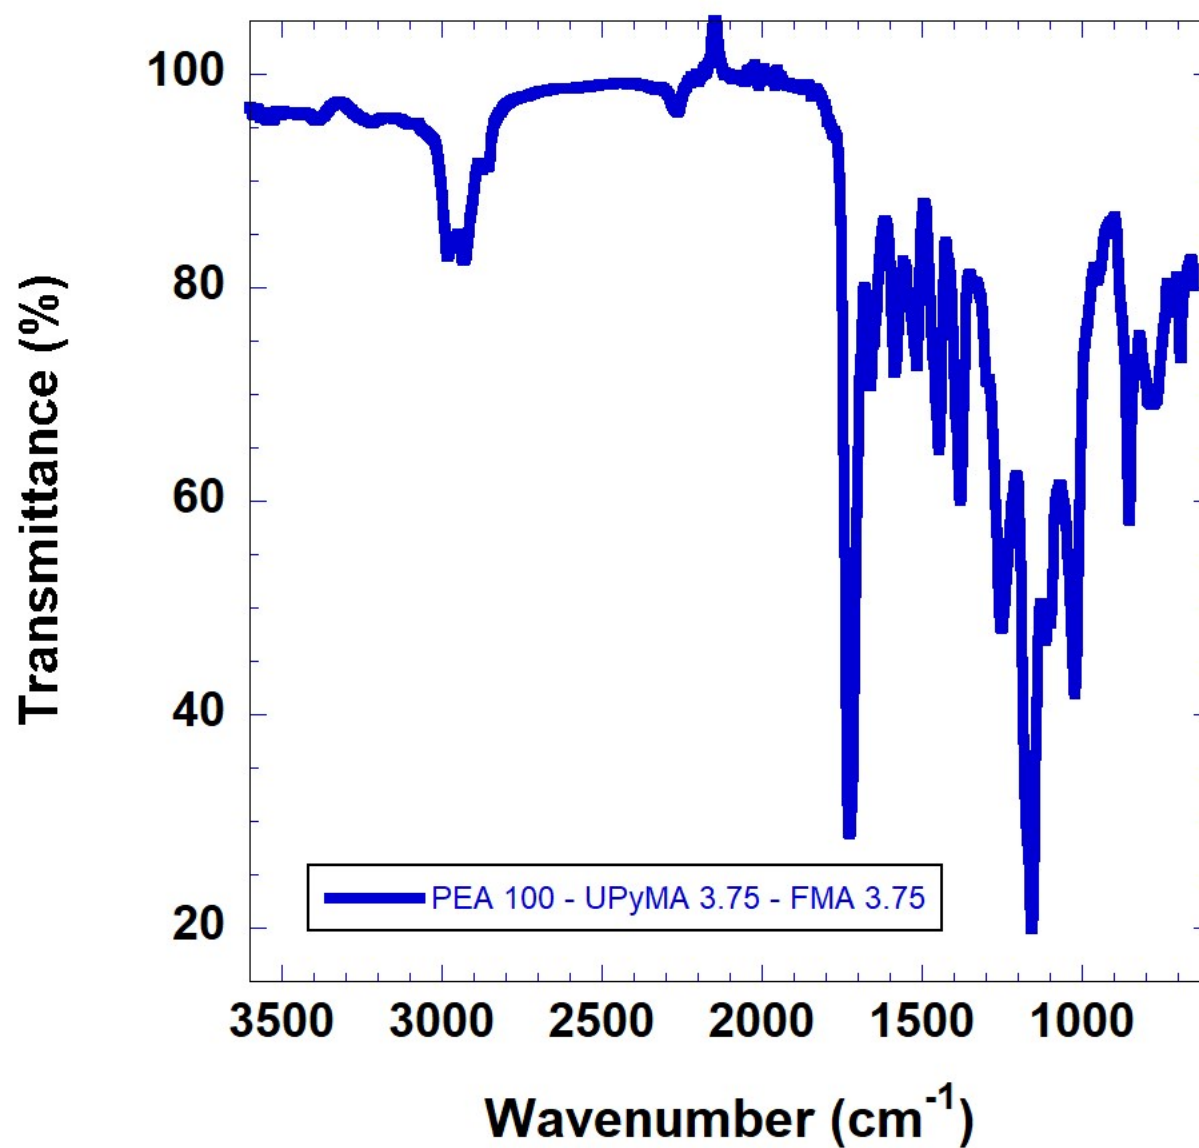

Figure S13: Infrared (IR) spectrum for PEA<sub>100</sub>-UPyMA<sub>3.75</sub>-FMA<sub>3.75</sub> material.

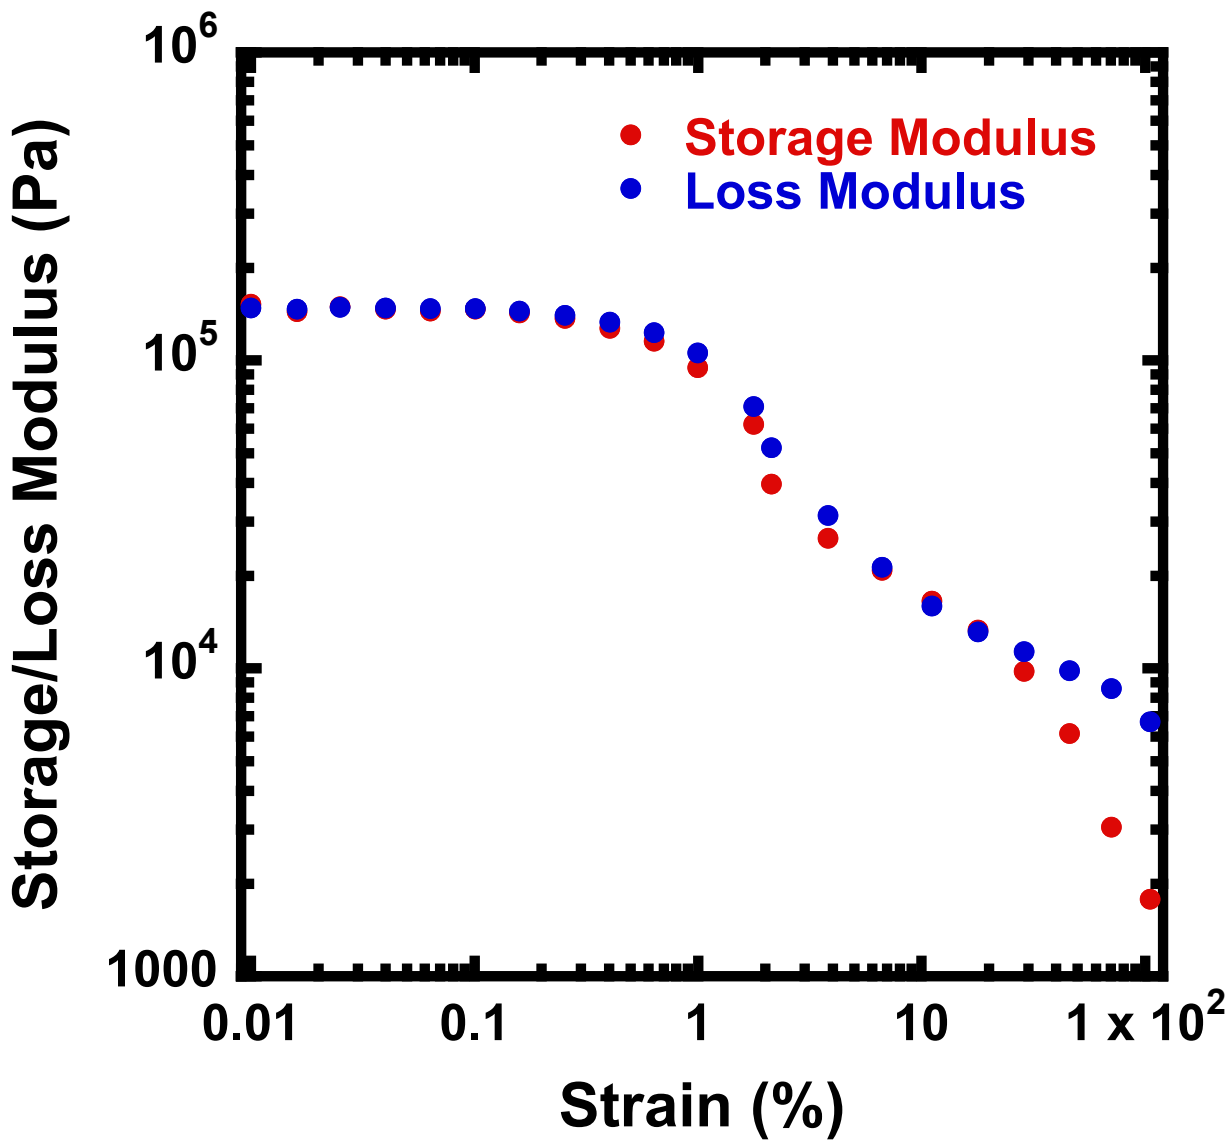

**Figure S14:** Rheological strain sweep of PEA<sub>100</sub>-UPyMA<sub>3.75</sub>-FMA<sub>3.75</sub> using a 1 Hz frequency at 25 °C.



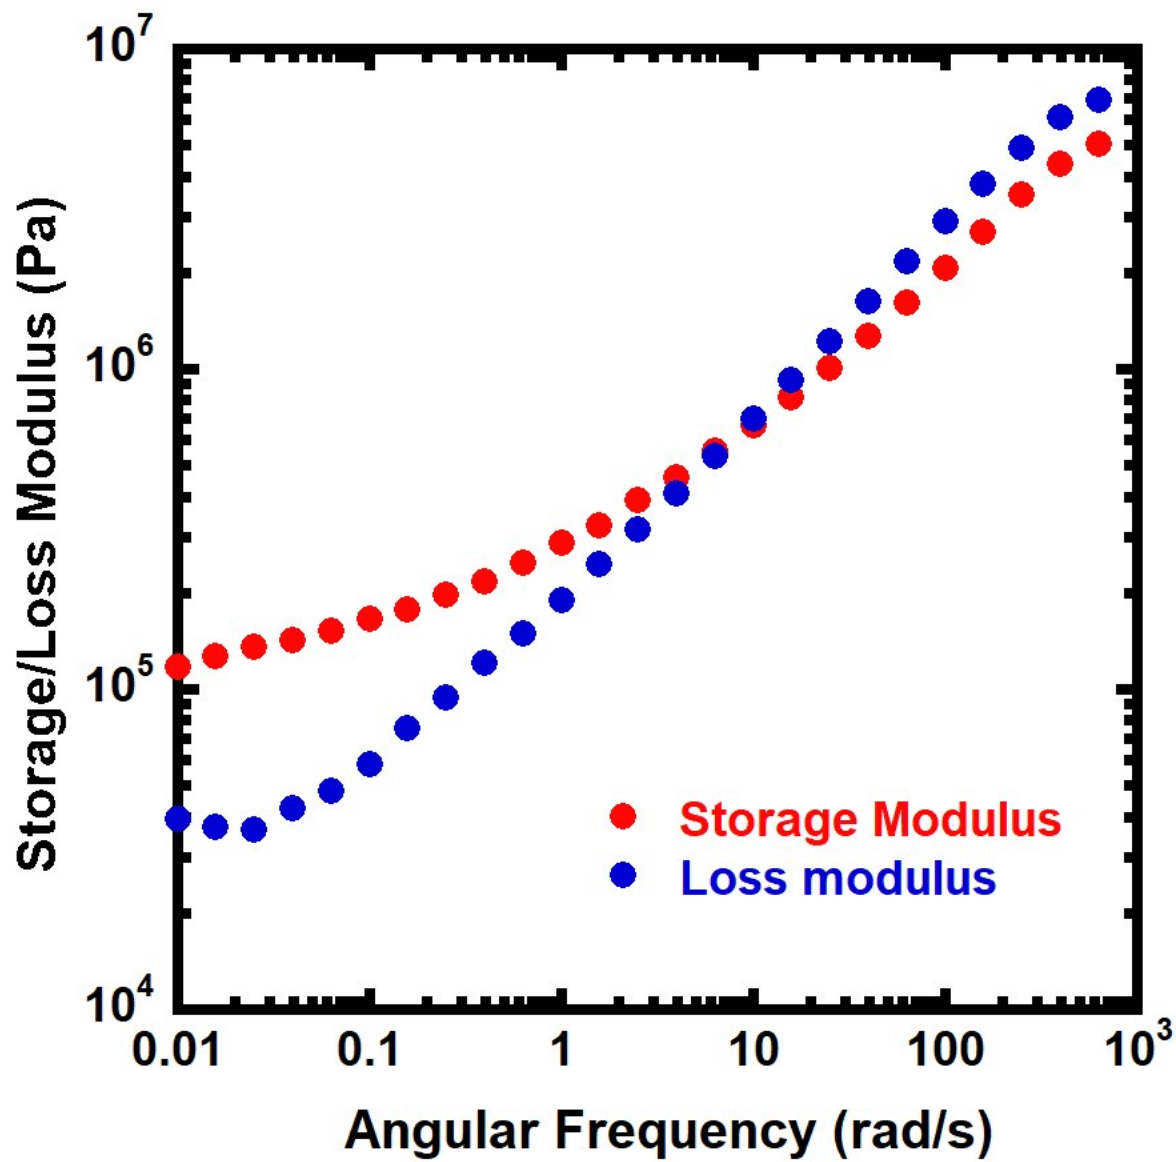

Figure S15: Rheological frequency sweep of PEA<sub>100</sub>-UPyMA<sub>2.5</sub>-FMA<sub>2.5</sub> using 0.1% strain at 25 °C.

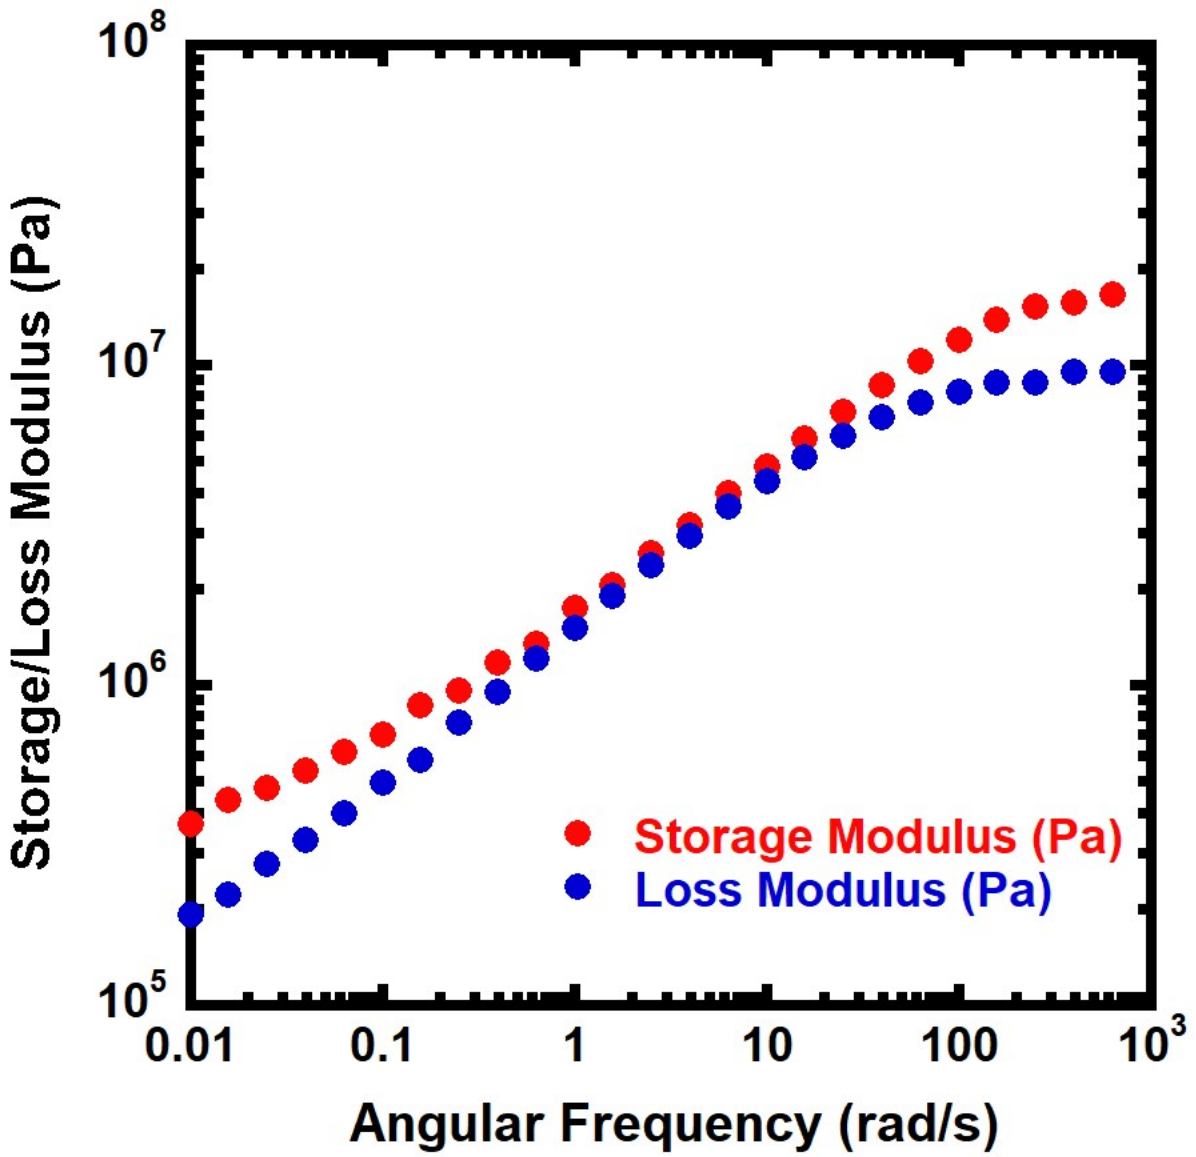

Figure S16: Rheological frequency sweep of PEA<sub>100</sub>-UPyMA<sub>5</sub>-FMA<sub>5</sub> using 0.1% strain at 25 °C.

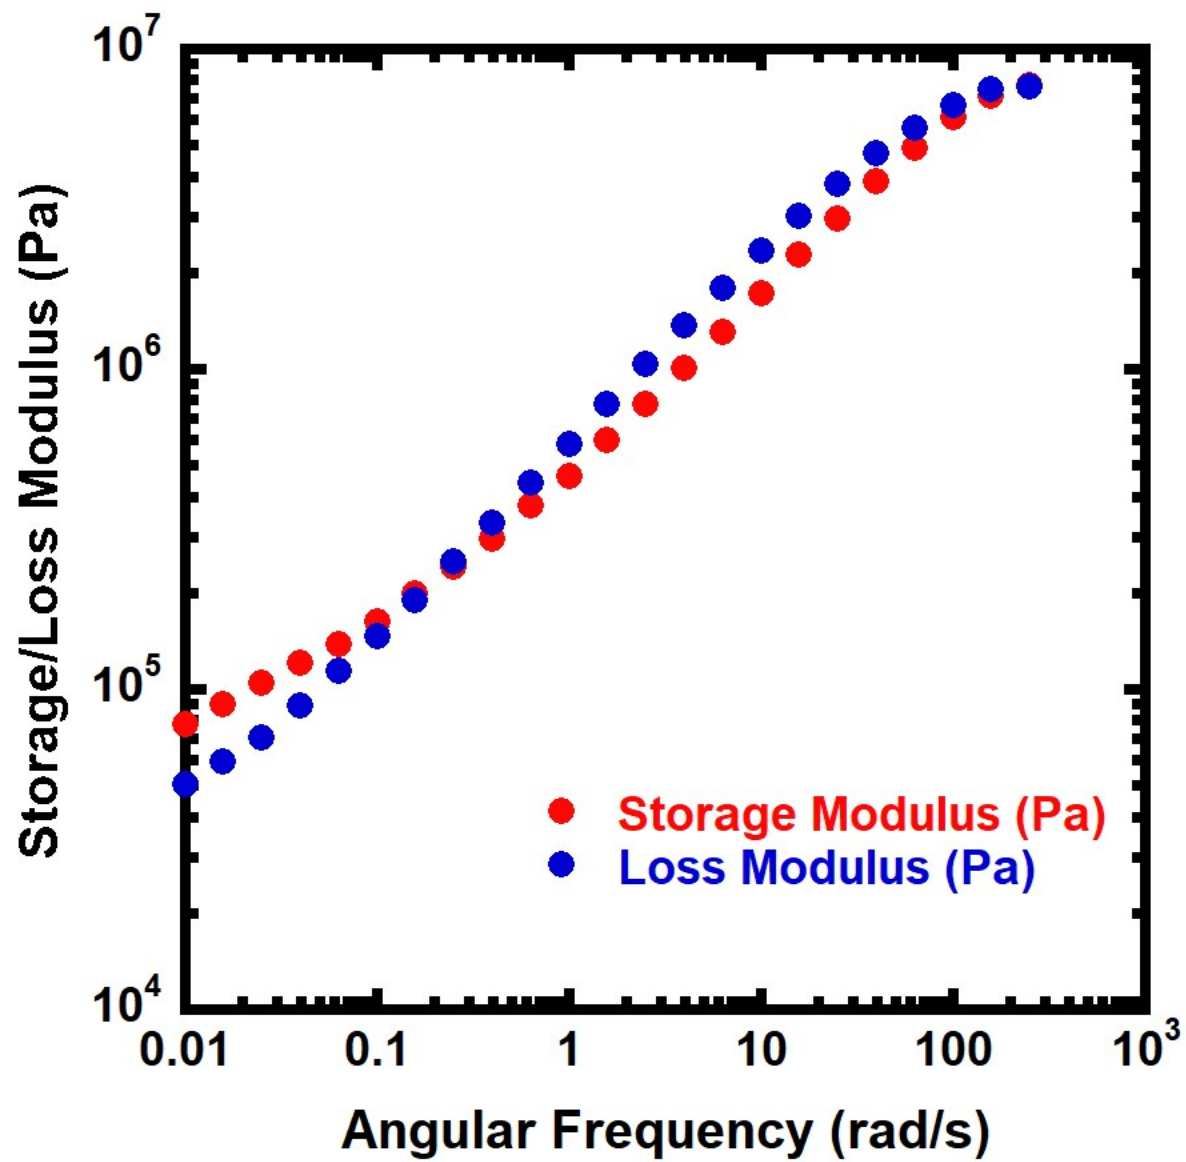

Figure S17: Rheological frequency sweep of PEA<sub>50</sub>-UPyMA<sub>1.9</sub>-FMA<sub>1.9</sub> using 0.1% strain at 25 °C.

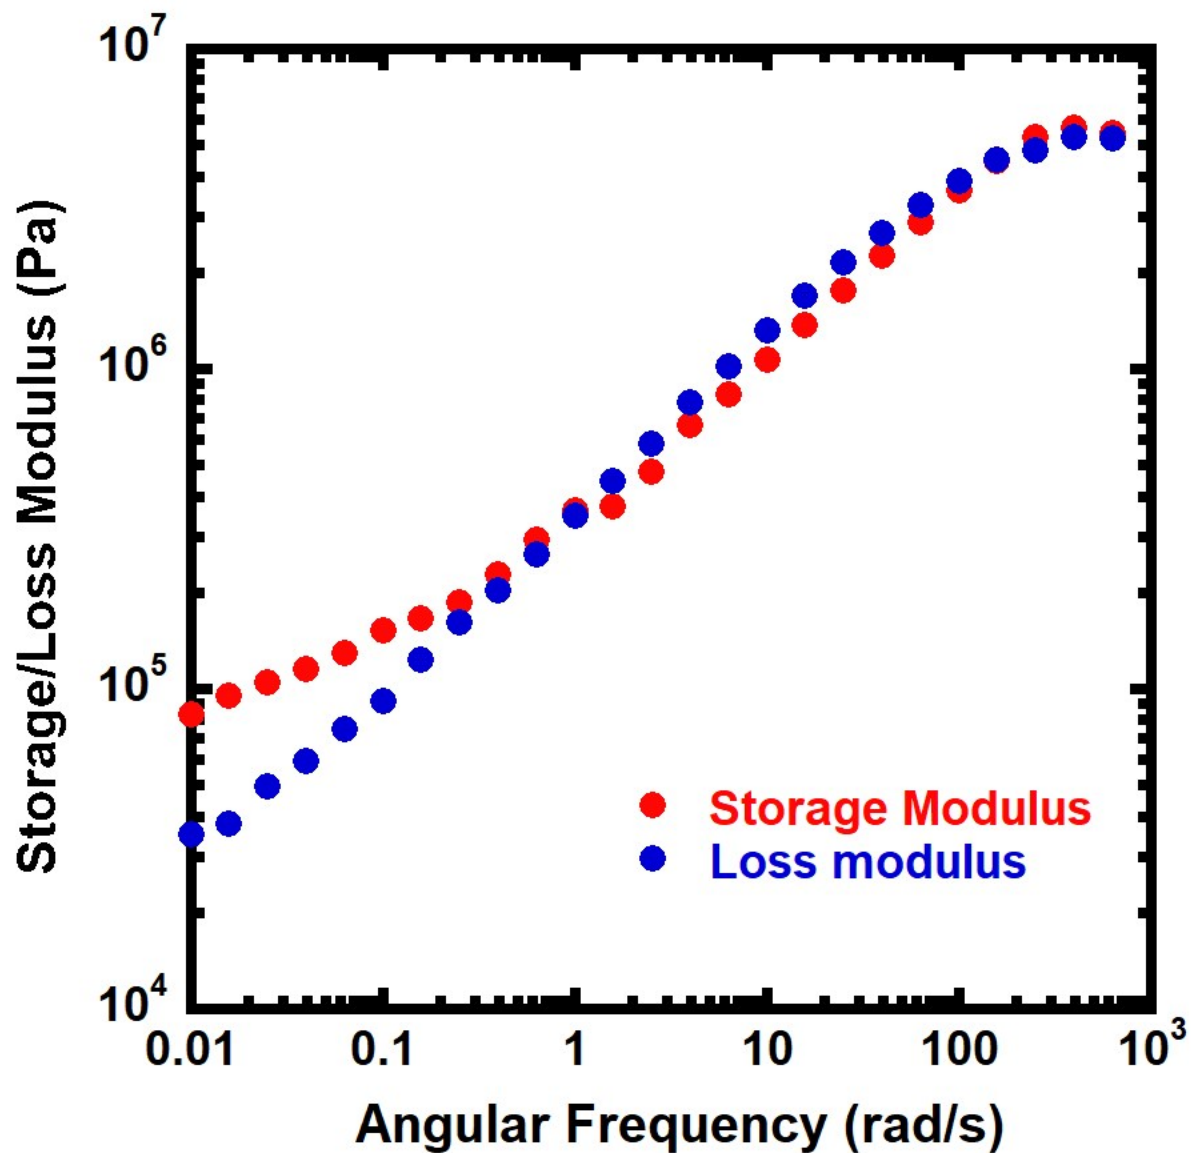

**Figure S18:** Rheological frequency sweep of PEA<sub>100</sub>-UPyMA<sub>3.75</sub>-FMA<sub>3.75</sub> using 0.1% strain at 25 °C.

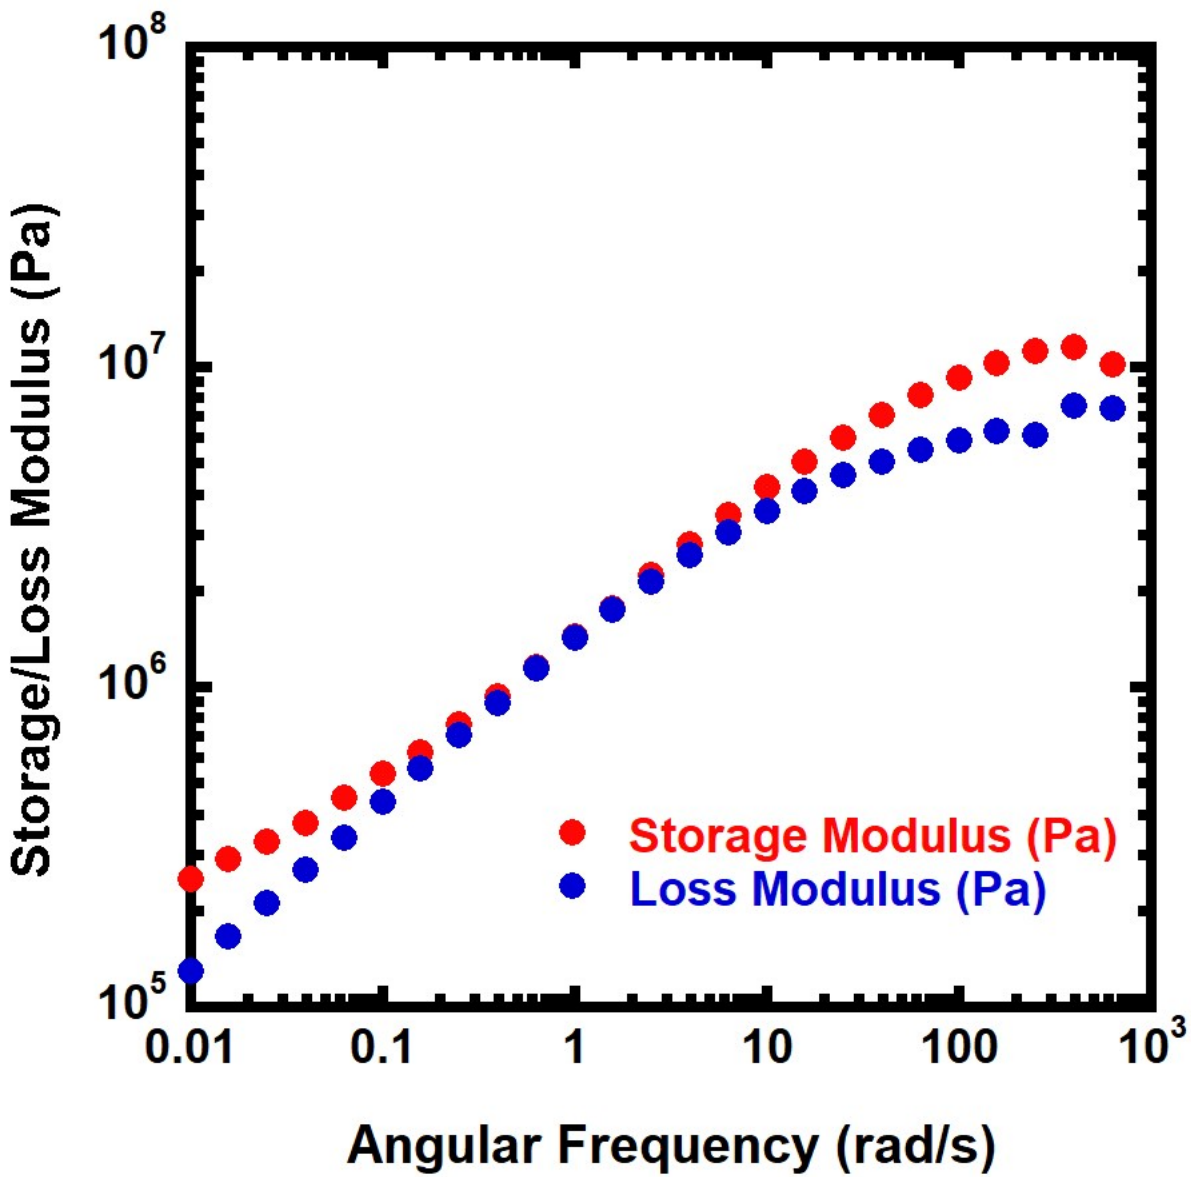

Figure S19: Rheological frequency sweep of PEA<sub>150</sub>-UPyMA<sub>5,6</sub>-FMA<sub>5,6</sub> using 0.1% strain at 25 °C.

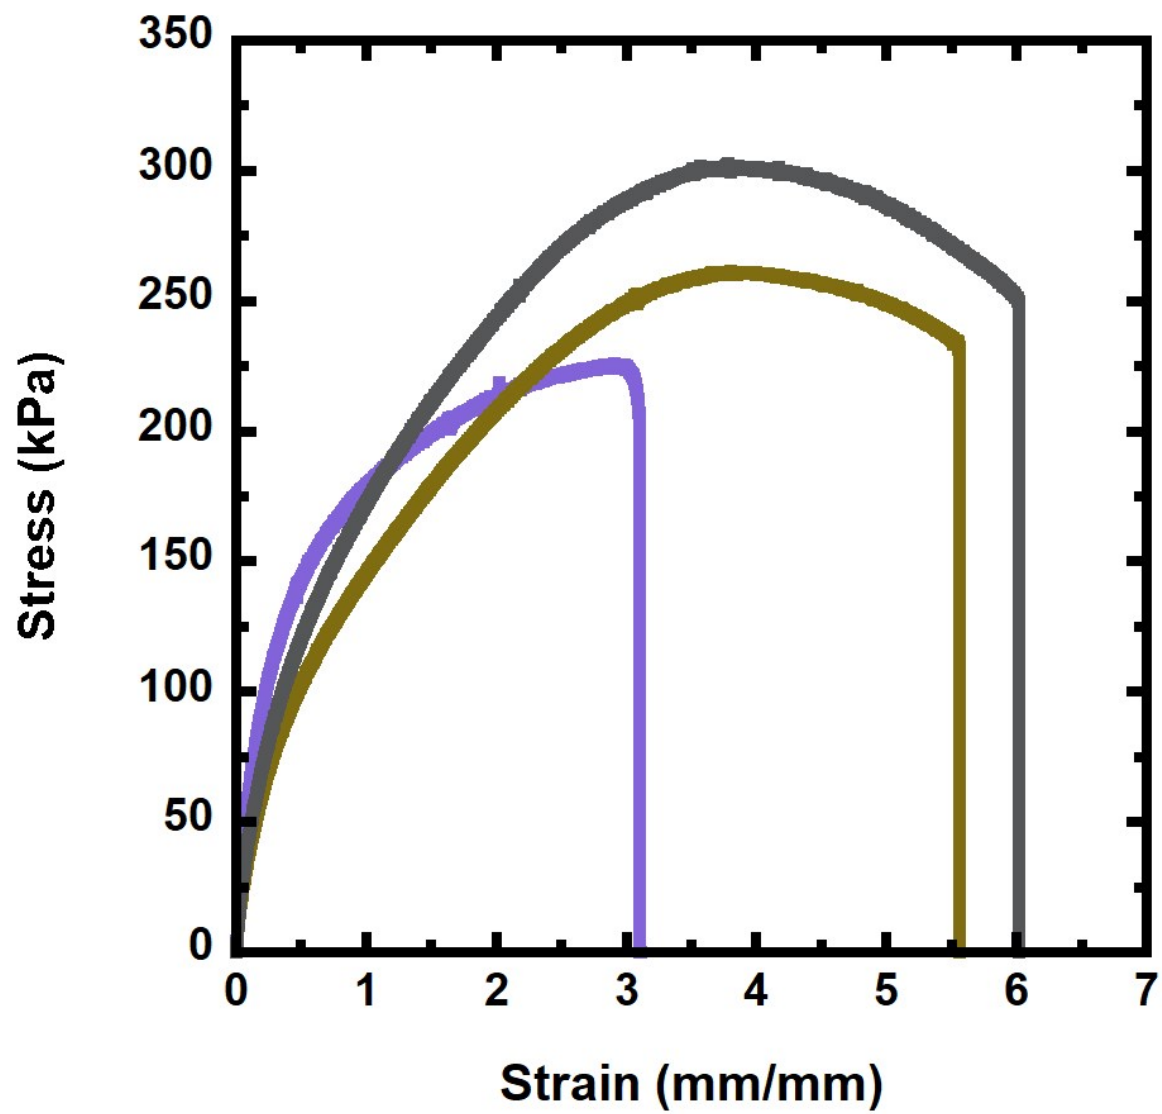

Figure S20: Uncut Variability of PEA<sub>100</sub>-UPyMA<sub>2.5</sub>-FMA<sub>2.5</sub>.

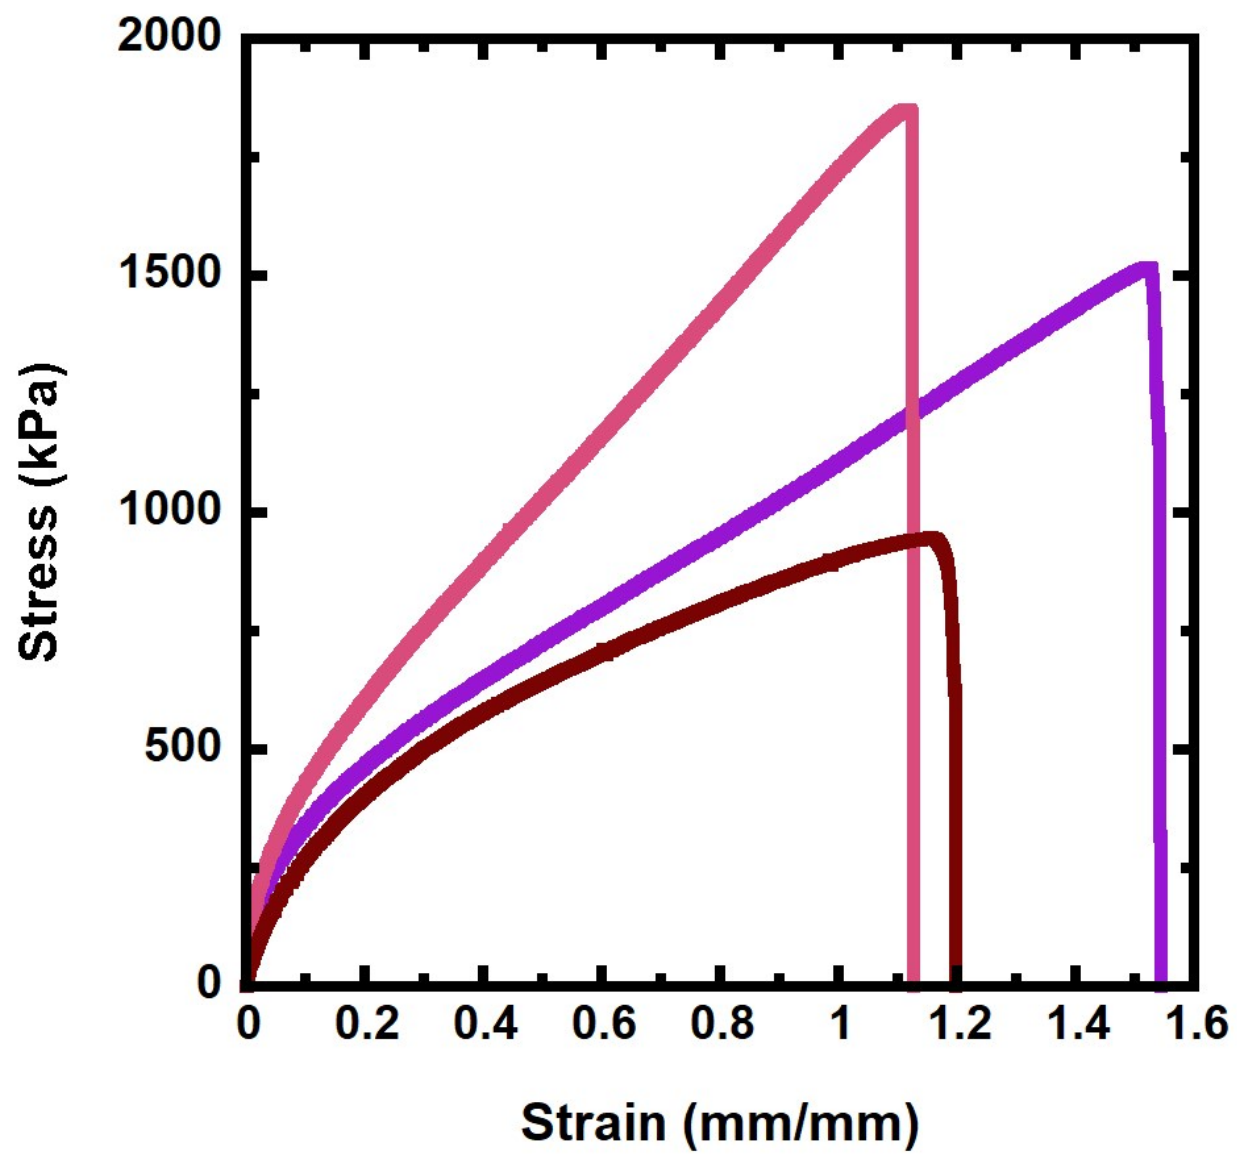

Figure S21: Uncut Variability of PEA<sub>100</sub>-UPyMA<sub>5</sub>-FMA<sub>5</sub>.

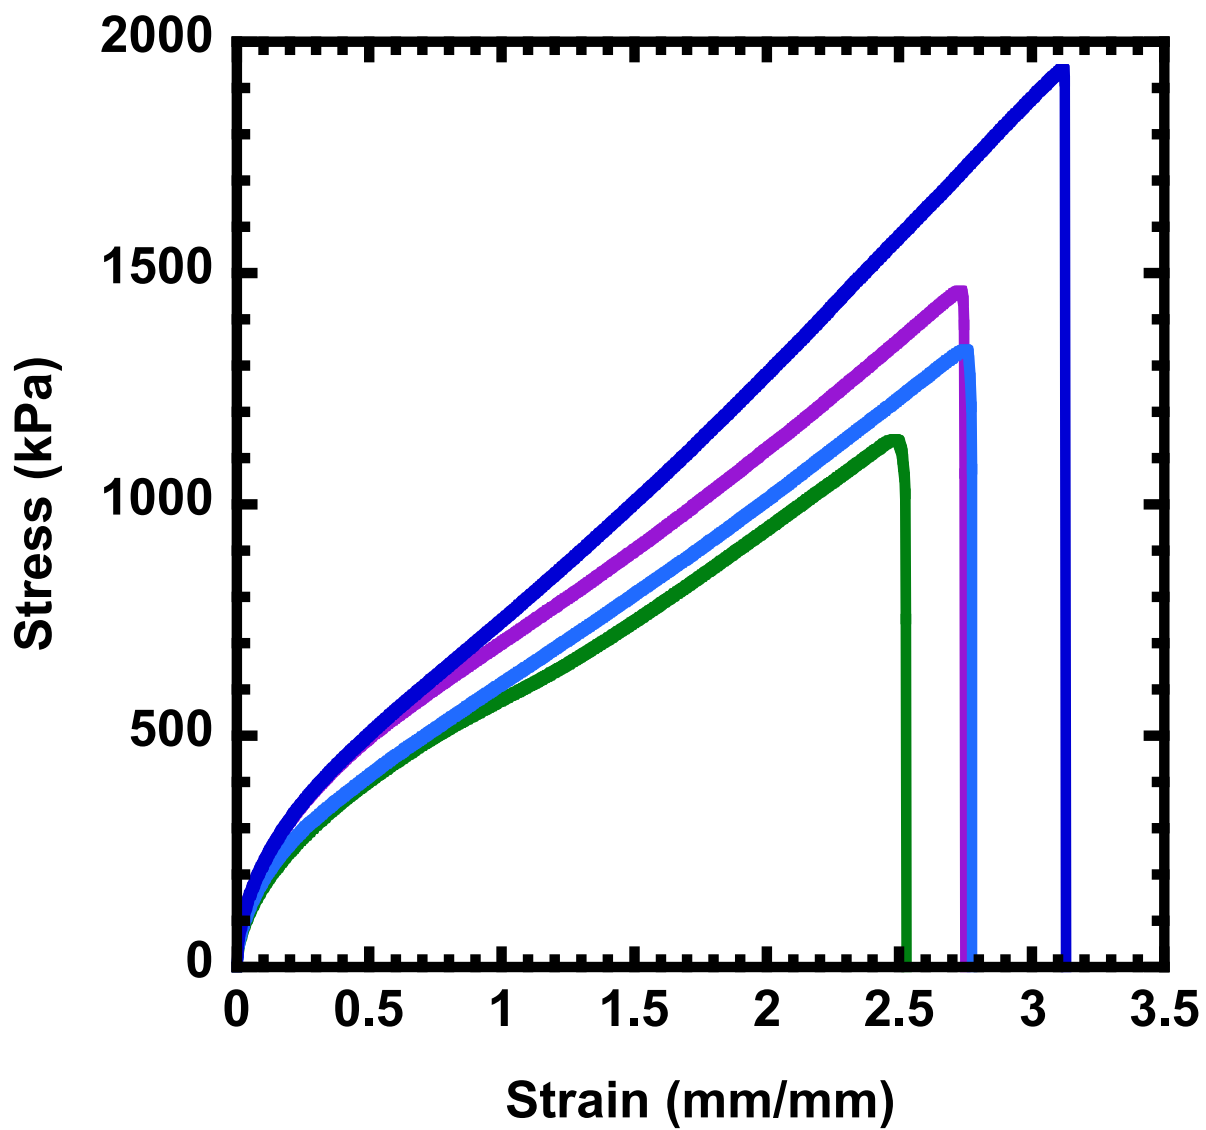

Figure S22: Uncut Variability of PEA<sub>100</sub>-UPyMA<sub>3.75</sub>-FMA<sub>3.75</sub>.



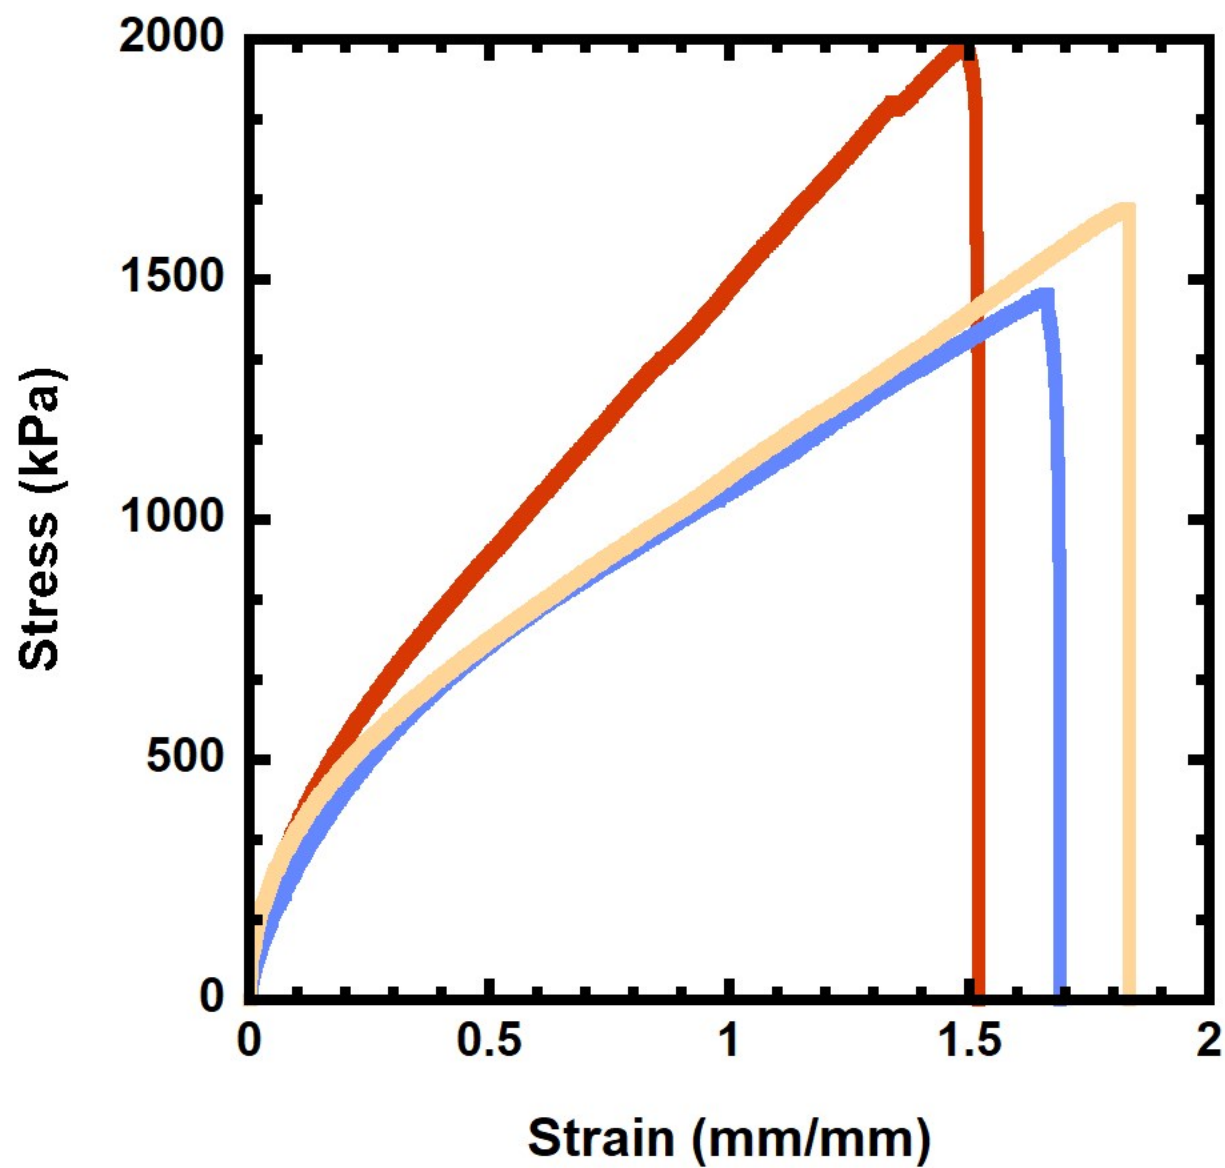

Figure S23: Uncut Variability of PEA<sub>150</sub>-UPyMA<sub>5.6</sub>-FMA<sub>5.6</sub>.

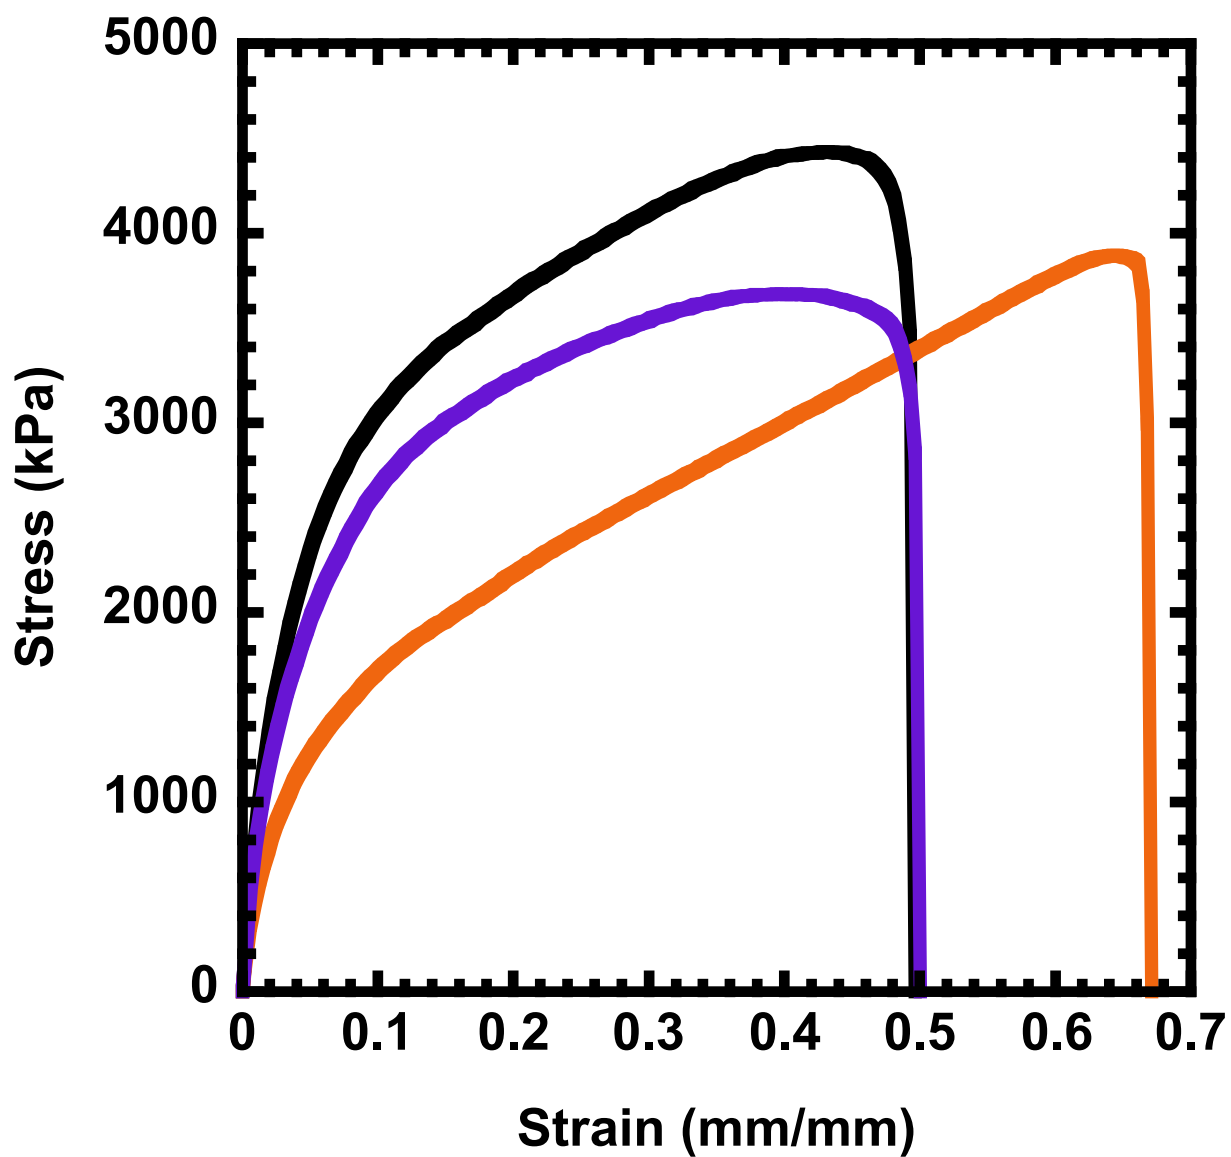

Figure S24: Uncut Variability of PEA<sub>100</sub>-UPyMA<sub>0</sub>-FMA<sub>10</sub> materials.

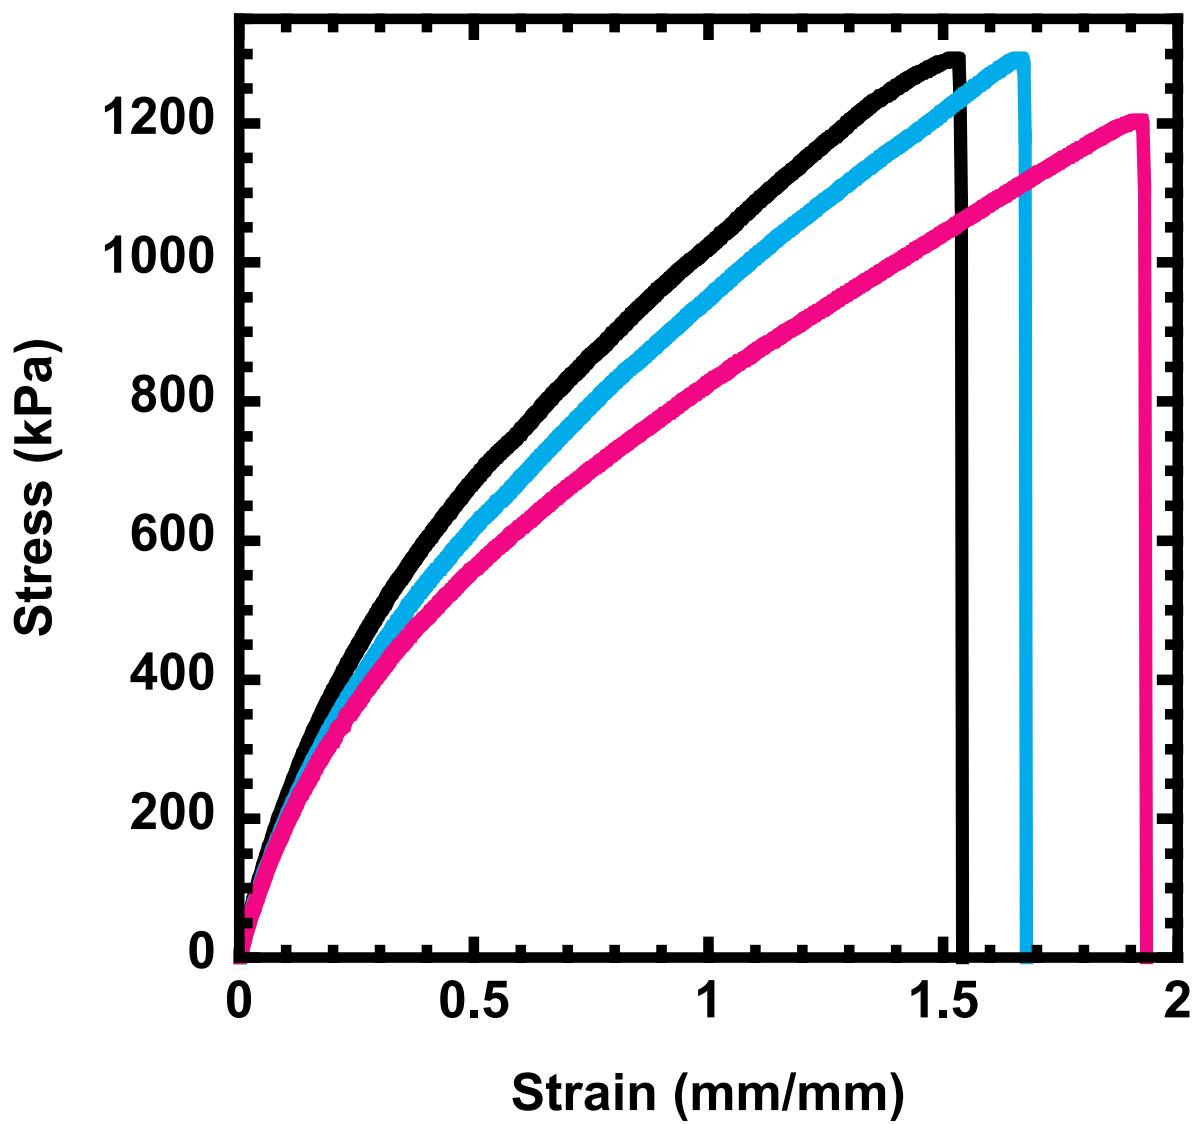

Figure S25: Uncut Variability of PEA<sub>100</sub>-UPyMA<sub>3.75</sub>-FMA<sub>3.75</sub>-FRP materials.

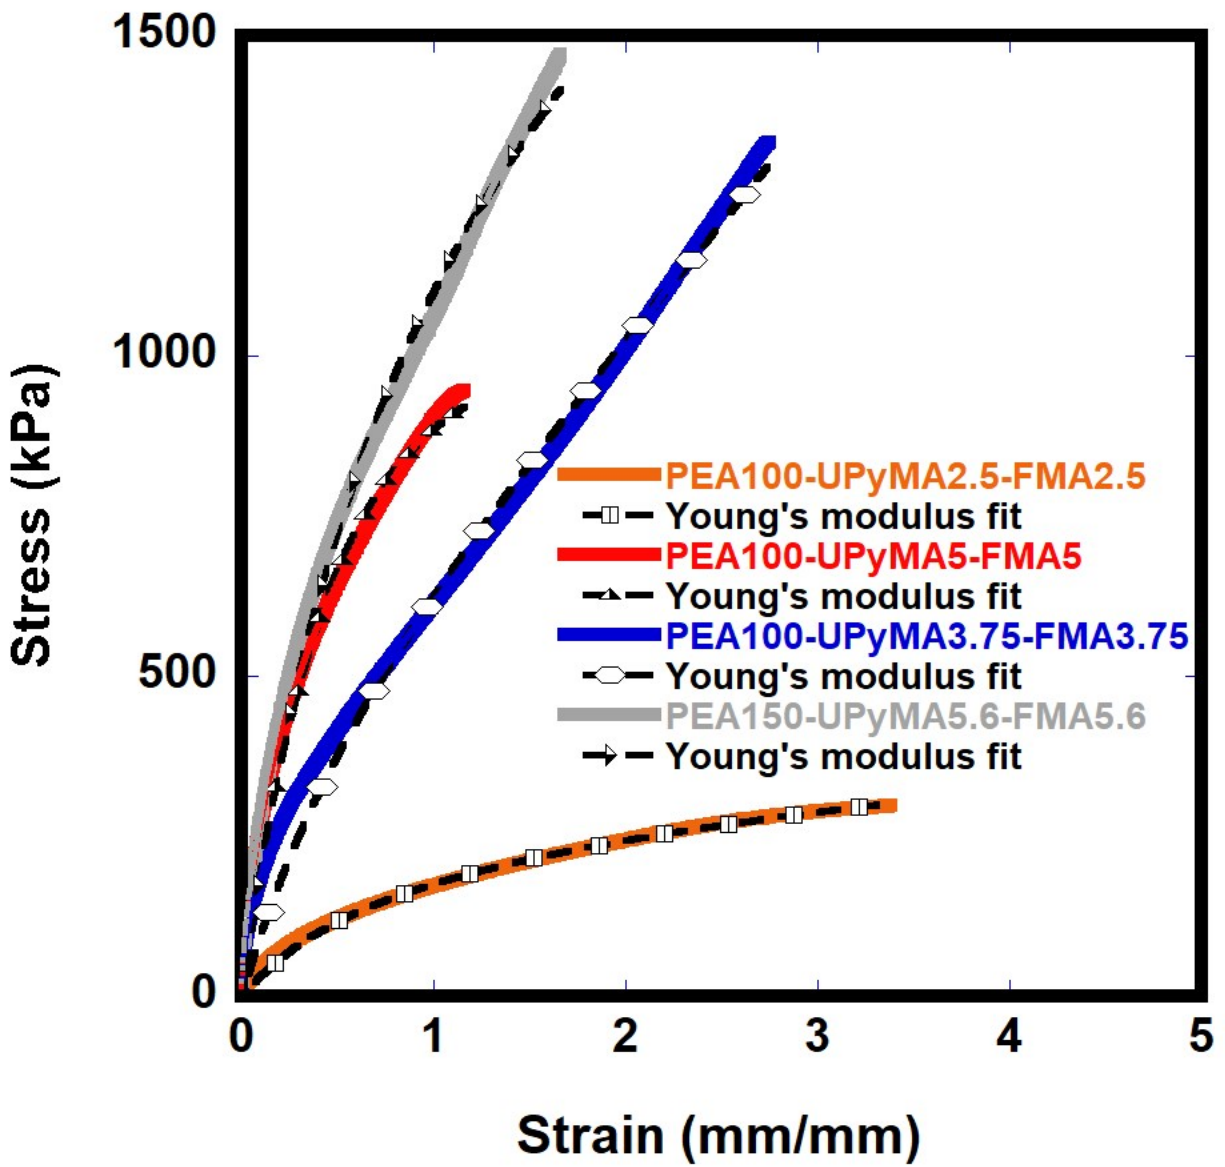

Figure S26: Fitted Young's modulus curves for typical each of the materials.

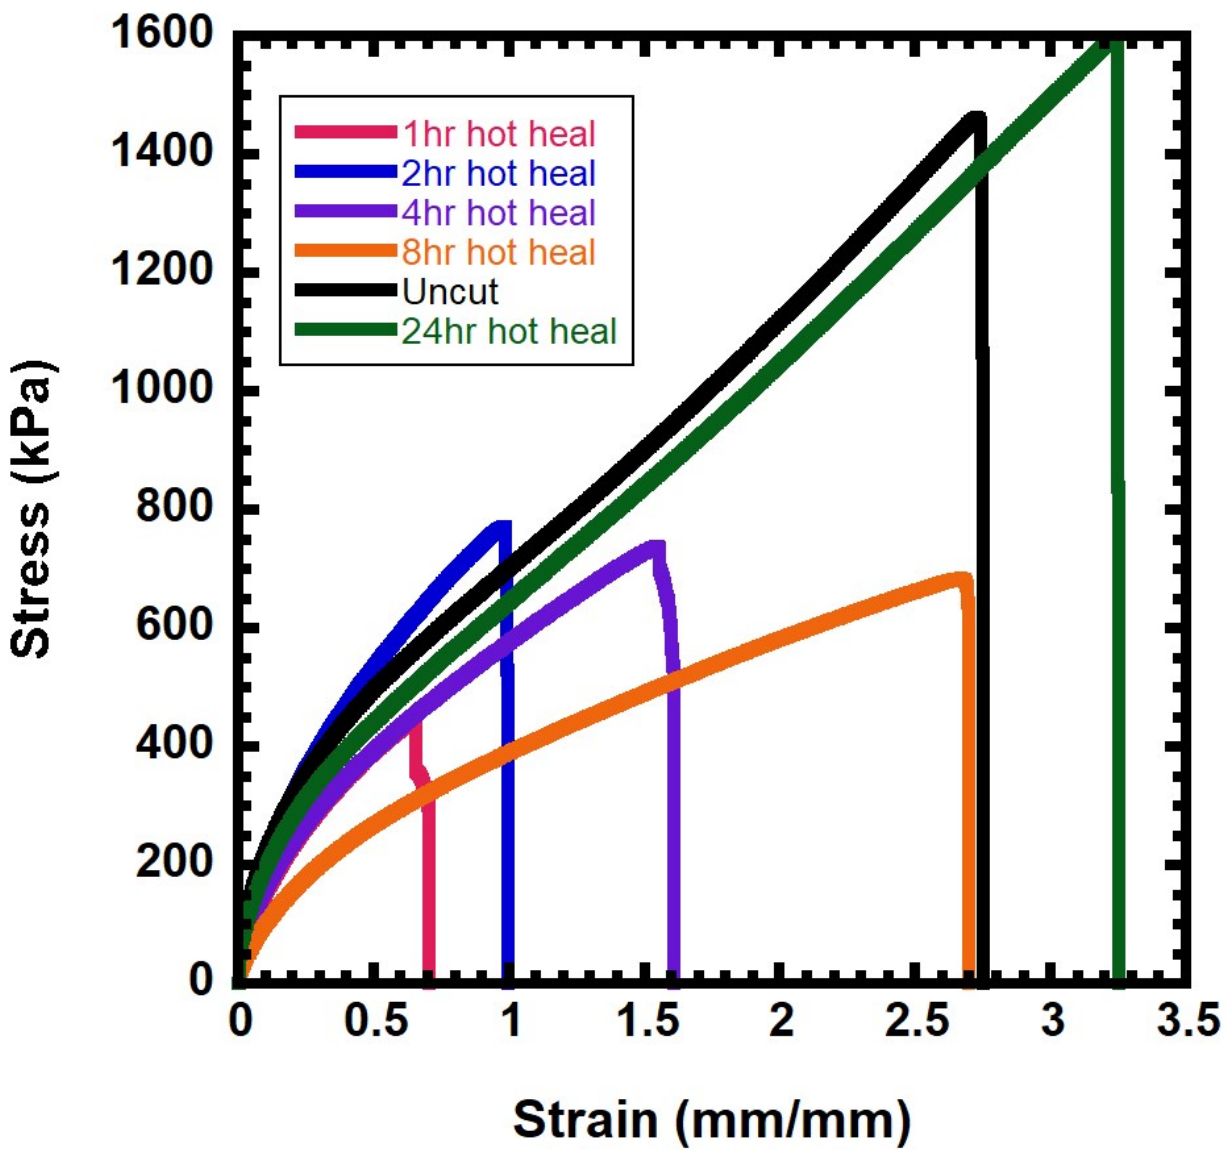

Figure S27: Self-healing properties of PEA<sub>100</sub>-UPyMA<sub>3.75</sub>-FMA<sub>3.75</sub> materials at 80 °C.

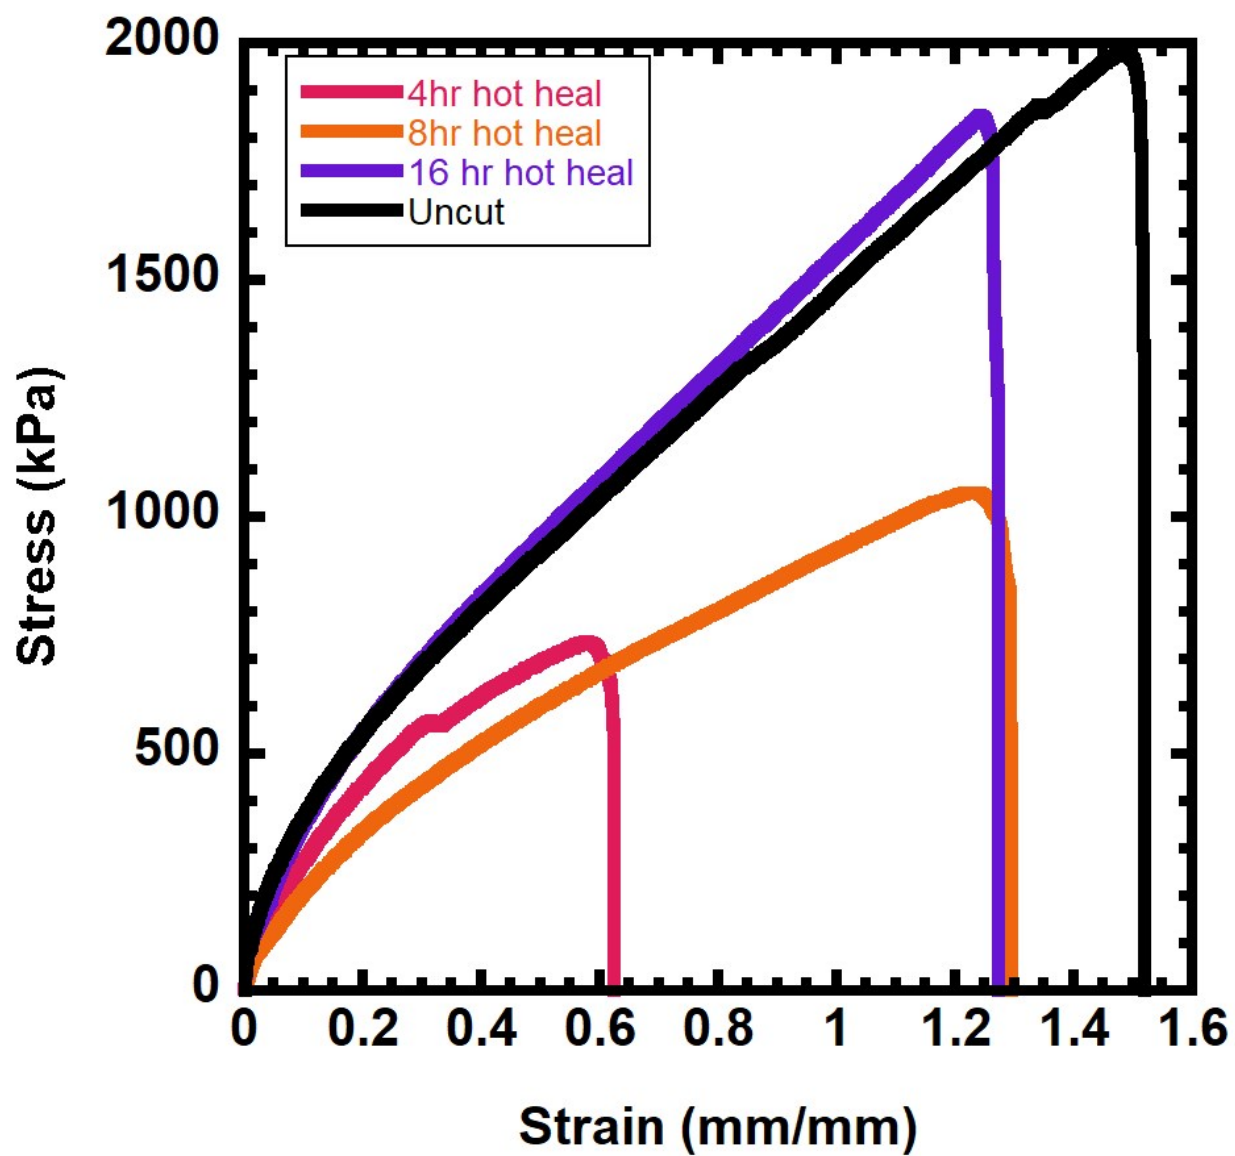

Figure S28: Self-healing properties of PEA<sub>150</sub>-UPyMA<sub>5.6</sub>-FMA<sub>5.6</sub> materials at 80 °C.

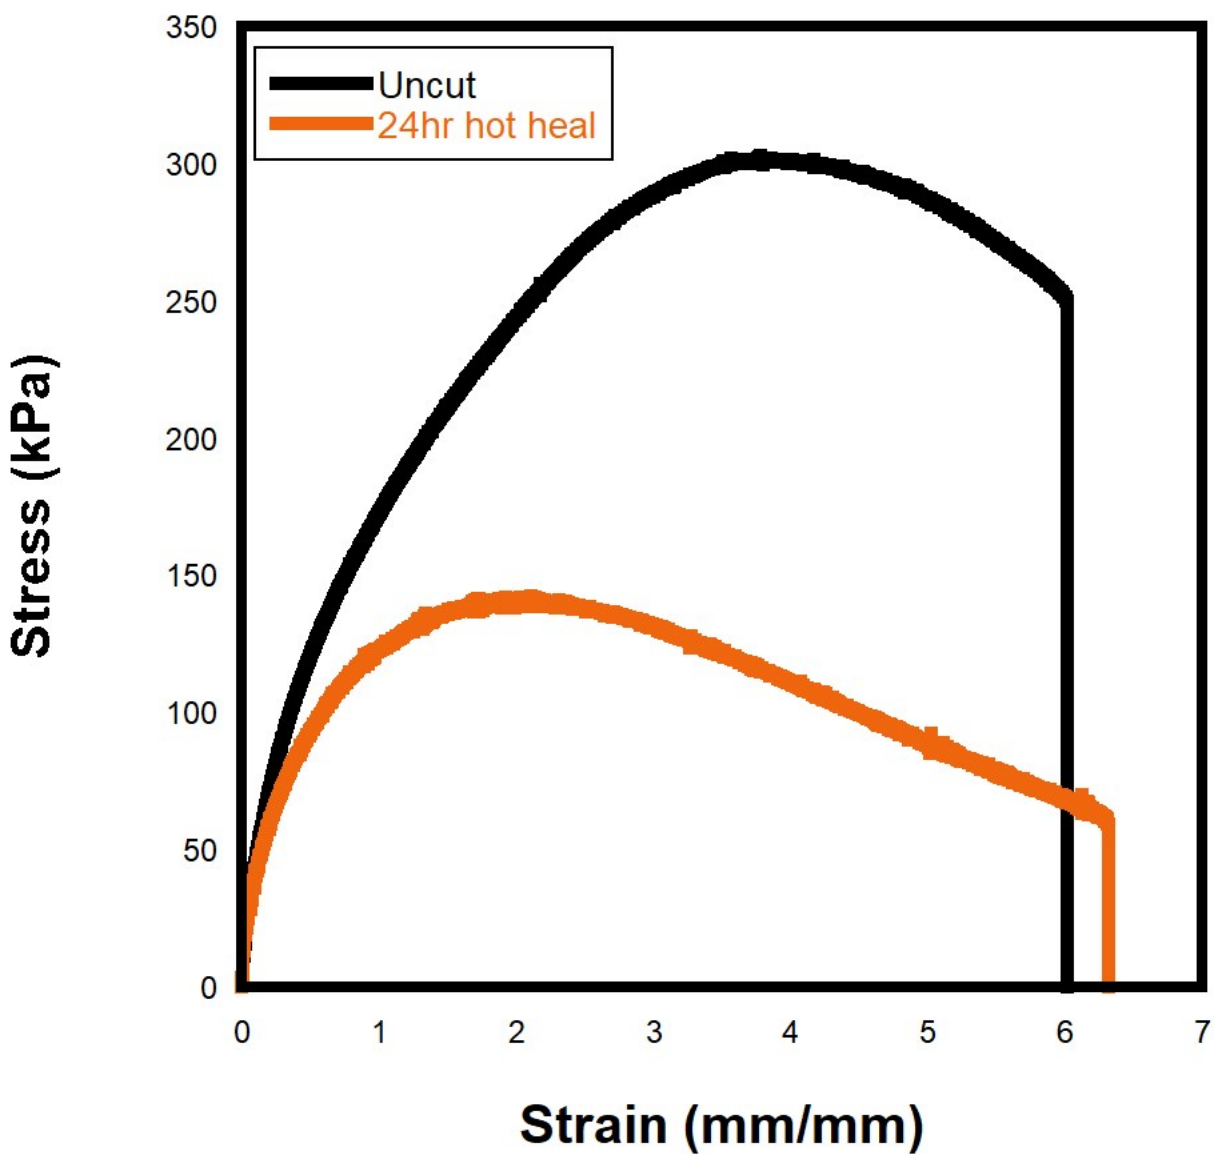

**Figure S29:** Self-healing properties of PEA<sub>100</sub>-UPyMA<sub>2.5</sub>-FMA<sub>2.5</sub> materials at 80 °C.

**Table S1:** Self-healing recovery of materials. a 24 h, b 16 h

| Material                                                                    | %Recovery Stress | %Recovery Strain |
|-----------------------------------------------------------------------------|------------------|------------------|
| PEA <sub>100</sub> -UPyMA <sub>2.5</sub> -FMA <sub>2.5</sub> <sup>a</sup>   | 49               | 105              |
| PEA <sub>100</sub> -UPyMA <sub>3.75</sub> -FMA <sub>3.75</sub> <sup>a</sup> | 100              | 95               |
| PEA <sub>100</sub> -UPyMA <sub>5</sub> -FMA <sub>5</sub> <sup>a</sup>       | 109              | 118              |
| PEA <sub>150</sub> -UPyMA <sub>5.6</sub> -FMA <sub>5.6</sub> <sup>b</sup>   | 93               | 84               |
